# Supplementary material
Source: MDPI journal article supplement (https://www.mdpi.com/1424-2818/14/12/1098)
Supplement: s1 [file s1]

Archive with 7 entries (7 files):
- Figure S1.pdf
- Figure S2.pdf
- Figure S3.pdf
- Supplementary Legends.pdf
- Supplementary Methods S1.pdf
- Table S1.pdf
- Table S2.xlsx
