# Supplementary material
Source: MDPI journal article supplement (https://www.mdpi.com/1424-2818/14/12/1098)

**Figure S2 A:** Comparison of assumed number of populations (K) for the *Structure* analysis of the contemporary dataset.

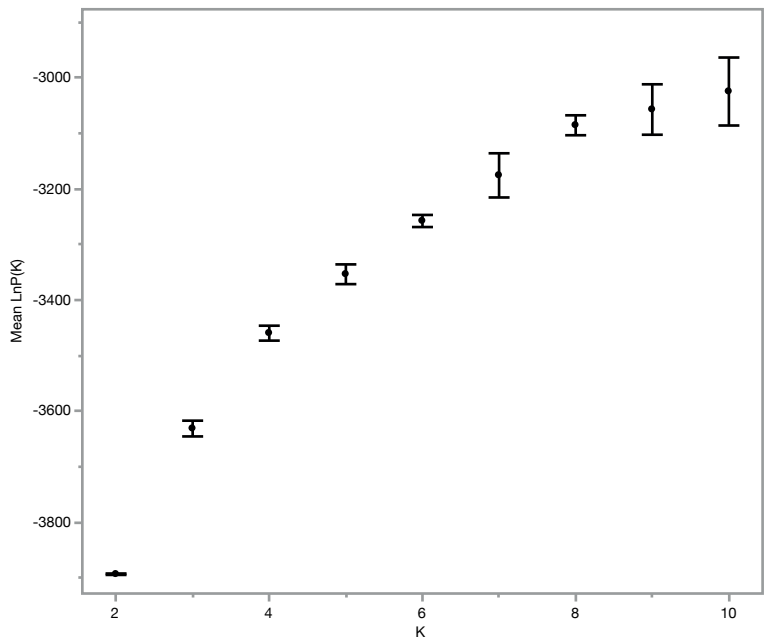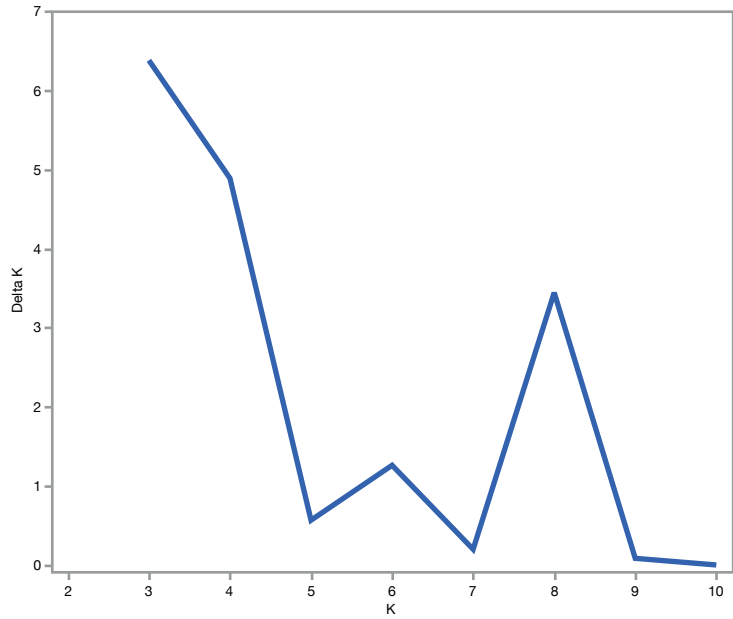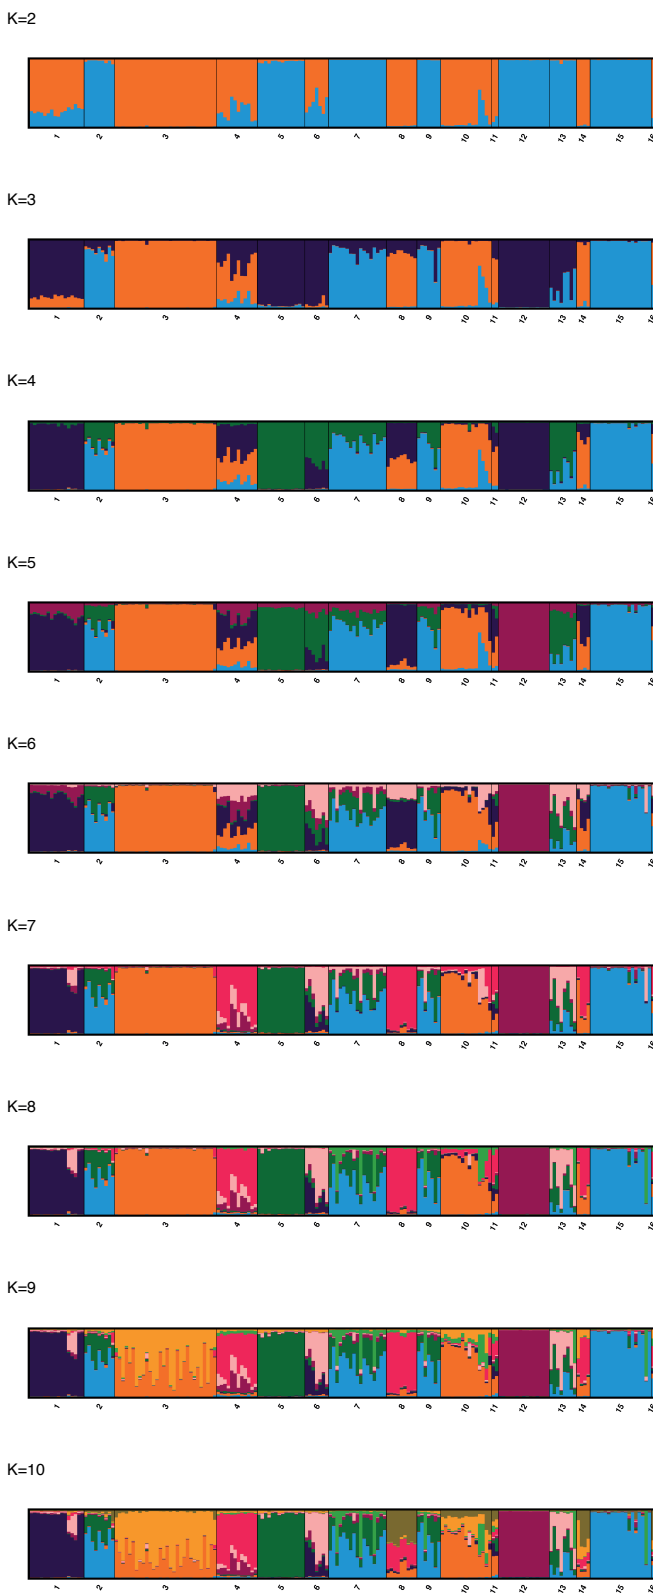

**Figure S2 B:** Comparison of assumed number of populations (K) for the *Structure* analysis of the combined dataset.

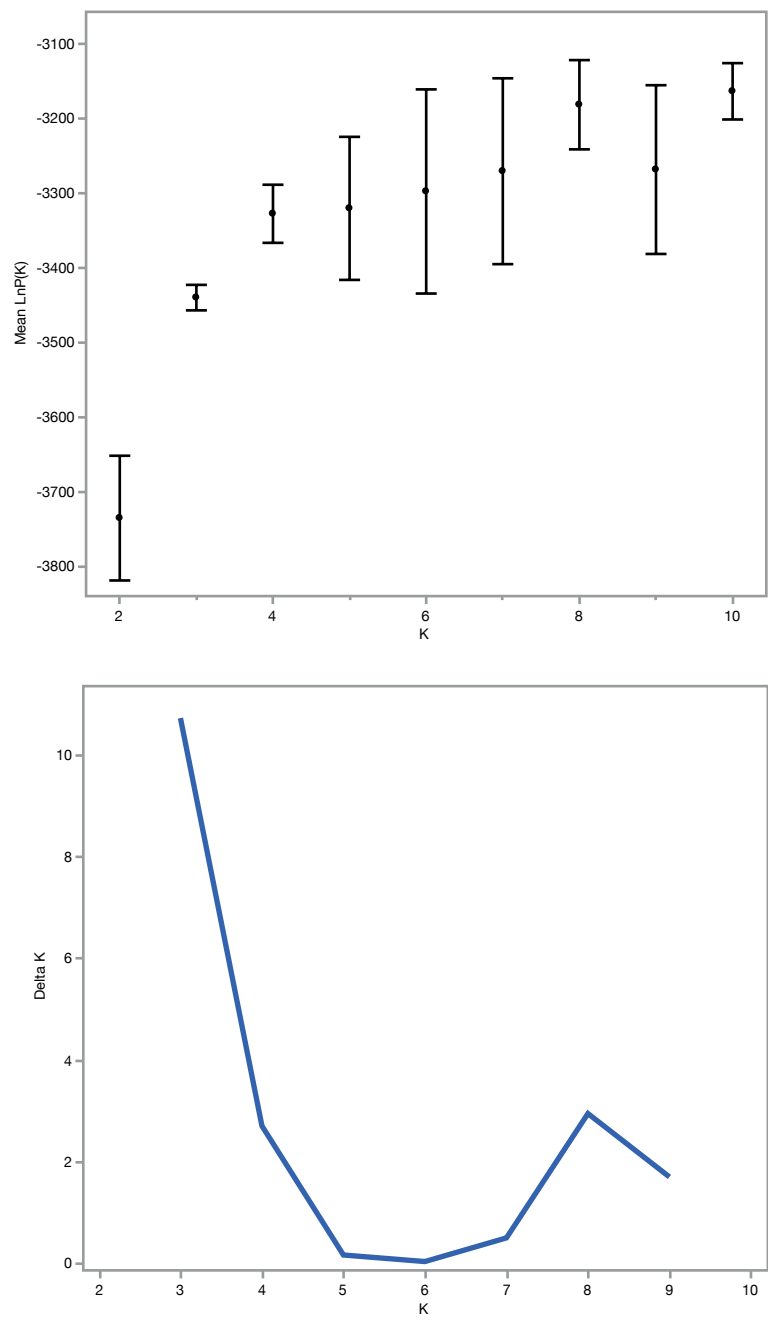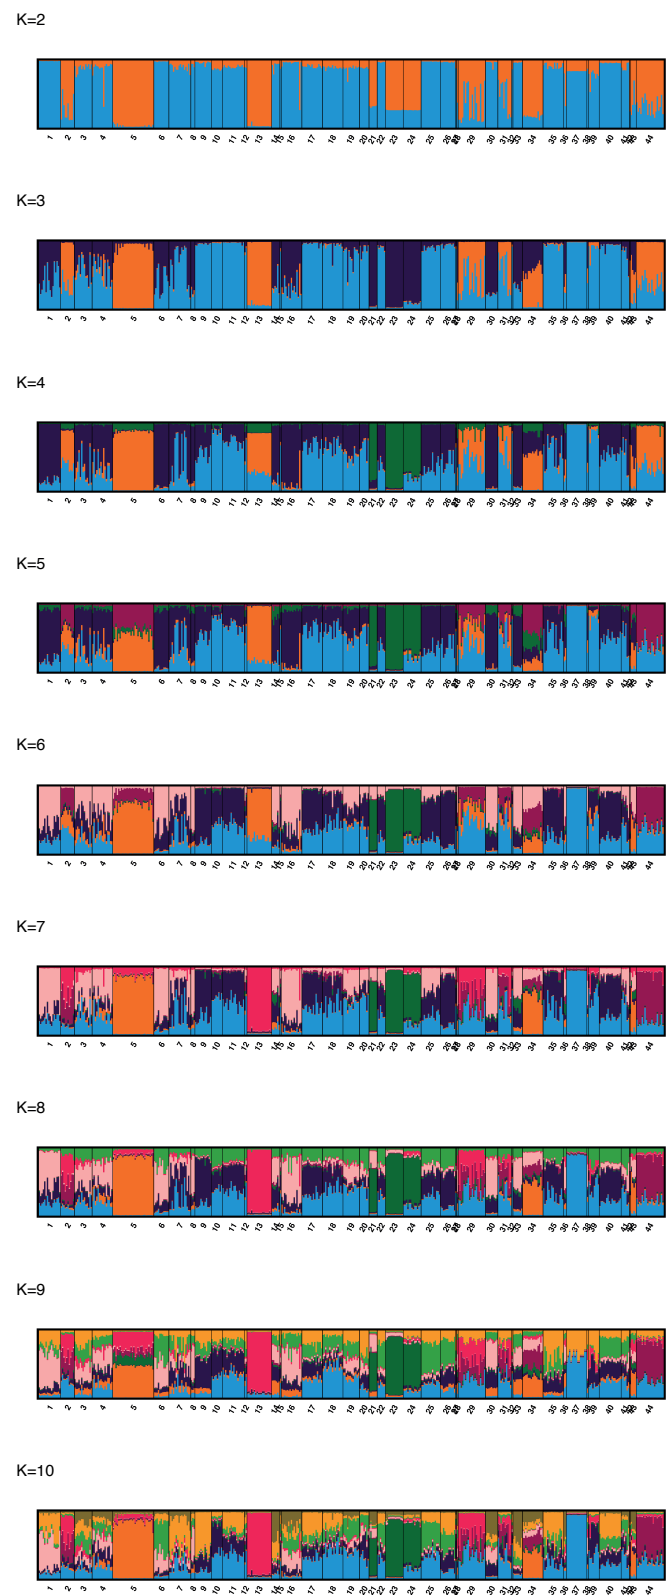

**Figure S2 C:** Comparison of assumed number of populations (K) for the *Structure* analysis of the contemporary dataset using 4 loci

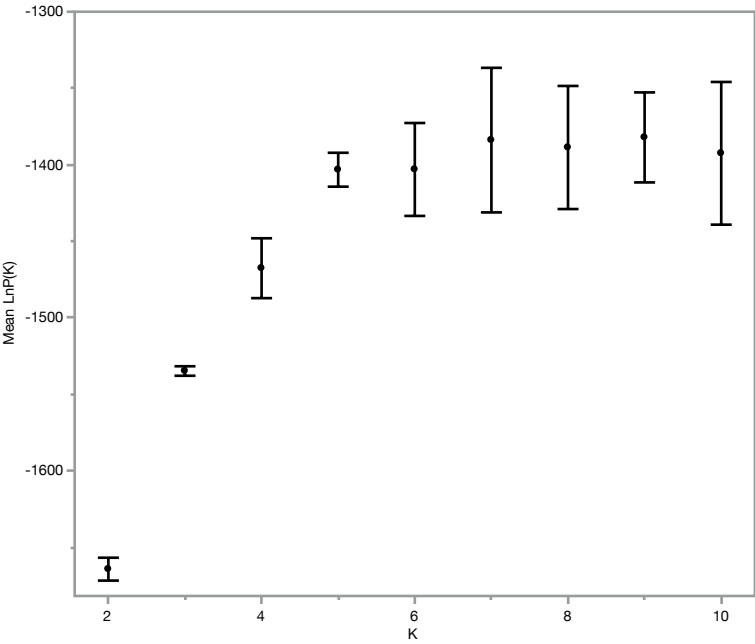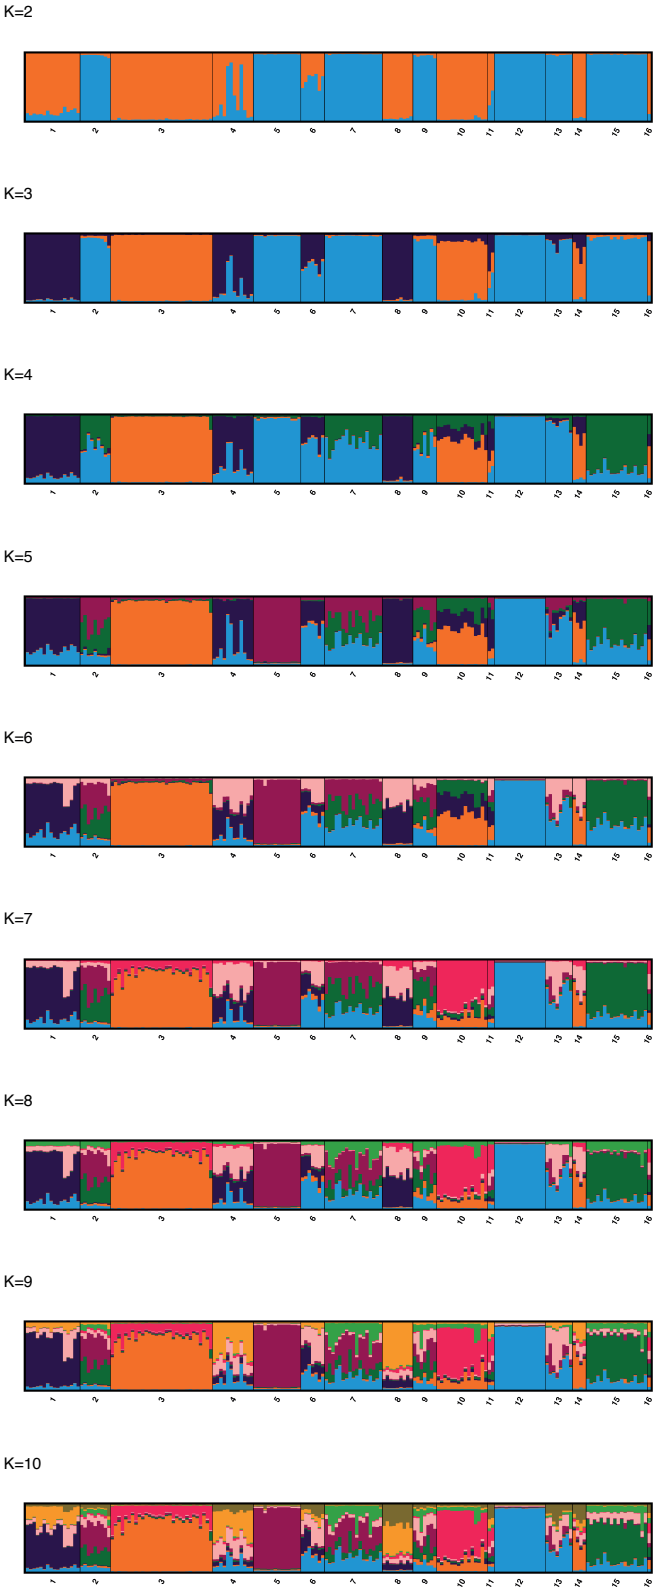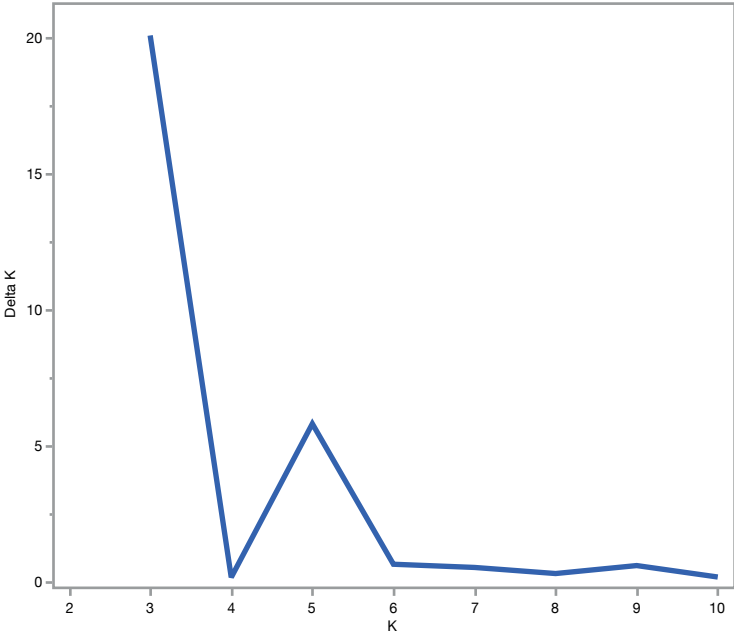

Supplement: s1 [file s1 › Figure S2.pdf]
