# Supplementary material
Source: MDPI journal article supplement (https://www.mdpi.com/1424-2818/14/12/1098)
Supplement: s1 [file s1 › Table S1.pdf]

| Name    | SSR motif                                                | Product size<br>range (bp) | T <sub>a</sub><br>(°C) | Dye | Mix<br>Group | Primer volumes<br>(μL) | Reference |
|---------|----------------------------------------------------------|----------------------------|------------------------|-----|--------------|------------------------|-----------|
| Macu20  | (CT) <sub>n</sub> (AT) <sub>n</sub> (CT) <sub>n</sub>    | 92-122                     | 57                     | Fam | 1            | 0.4 F + R              |           |
| Macu26  | (CA) <sub>n</sub>                                        | 92-128                     | 57                     | Ned | 1            | 0.4 F + R              |           |
| Macu29  | (TC) <sub>n</sub>                                        | 81-143                     | 57                     | Vic | 1            | 0.4 F + R              |           |
| Macu30  | (TG) <sub>n</sub>                                        | 93-109                     | 57                     | Pet | 1            | 0.4 F + R              |           |
| Macu44  | (AC) <sub>n</sub>                                        | 170-220                    | 57                     | Ned | 1            | 0.4 F + R              |           |
| Macu28  | (CT) <sub>n</sub> (CGCA) <sub>n</sub> (CA) <sub>n</sub>  | 195-223                    | 57                     | Fam | 2            | 0.5 F + R              |           |
| Macu24  | (CA) <sub>n</sub>                                        | 212-216                    | 57                     | Pet | 2            | 0.5 F + R              |           |
| Macu45  | (AC) <sub>n</sub> (GC) <sub>n</sub> (AC) <sub>n</sub>    | 145-217                    | 57                     | Vic | 2            | 0.5 F + R              |           |
| Macu22  | (GA) <sub>n</sub>                                        | 151-153                    | 57                     | Ned | 2            | 0.5 F + R              |           |
| Macu08  | (CA) <sub>n</sub>                                        | 164-252                    | 60                     | Ned | 3            | 0.6 F + R              |           |
| Macu15  | (CA) <sub>n</sub>                                        | 128-290                    | 60                     | Fam | 3            | 1.0 F + R              |           |
| Macu31  | (GTA) <sub>n</sub> (GTC) <sub>n</sub> (GTA) <sub>n</sub> | 110-173                    | 62                     | Fam | 4            | 0.4 F + R              |           |
| Malc169 | (GT) <sub>n</sub>                                        | 217-251                    | 62                     | Fam | 4            | 0.8 F + R              |           |
| Macu11  | (CA) <sub>n</sub>                                        | 188-204                    | 62                     | Ned | 4            | 0.8 F + R              |           |
