# Supplementary material
Source: MDPI journal article supplement (https://www.mdpi.com/1424-2818/14/12/1098)
Supplement: s1 [file s1 › Table S2.xlsx]

## Sheet: All samples
							Allele length (BP)
							Macu20		Macu26		Macu30		Macu31		Macu29		Macu44		Macu28		Macu45		Macu22		Macu24		Macu08		Macu11
Specimen	Location	Locality	Latitude	Longitude	Year	Dataset	A1	A2	A1	A2	A1	A2	A1	A2	A1	A2	A1	A2	A1	A2	A1	A2	A1	A2	A1	A2	A1	A2	A1	A2
AAS01	AalbaekStampemoelle2021	Ålbæk Stampemølle	55.01	8.65	2021	Contemporary	96	104	109	111	101	101	143	143	99	99	0	0	204	204	166	186	153	153	0	0	207	207	199	199
AAS02	AalbaekStampemoelle2021	Ålbæk Stampemølle	55.01	8.65	2021	Contemporary	100	100	109	111	101	101	131	140	127	127	0	0	204	204	166	186	153	153	0	0	207	207	199	199
AAS03	AalbaekStampemoelle2021	Ålbæk Stampemølle	55.01	8.65	2021	Contemporary	100	100	109	111	101	101	0	0	99	99	0	0	204	204	166	186	153	153	0	0	207	207	0	0
AAS04	AalbaekStampemoelle2021	Ålbæk Stampemølle	55.01	8.65	2021	Contemporary	104	110	109	111	101	101	131	134	99	99	0	0	204	204	166	186	153	153	0	0	207	207	199	199
AAS05	AalbaekStampemoelle2021	Ålbæk Stampemølle	55.01	8.65	2021	Contemporary	104	104	111	111	101	101	131	134	99	99	0	0	204	204	166	166	153	153	0	0	207	207	199	199
AAS06	AalbaekStampemoelle2021	Ålbæk Stampemølle	55.01	8.65	2021	Contemporary	100	104	109	111	101	101	140	143	99	99	0	0	204	204	166	186	153	153	0	0	207	207	197	199
AAS07	AalbaekStampemoelle2021	Ålbæk Stampemølle	55.01	8.65	2021	Contemporary	96	104	111	111	101	101	131	134	99	99	0	0	204	204	166	186	153	153	0	0	207	207	199	199
AAS08	AalbaekStampemoelle2021	Ålbæk Stampemølle	55.01	8.65	2021	Contemporary	104	110	109	111	101	101	131	134	99	99	0	0	204	204	166	166	153	153	0	0	207	207	199	199
AAS09	AalbaekStampemoelle2021	Ålbæk Stampemølle	55.01	8.65	2021	Contemporary	100	104	109	111	101	101	131	131	127	127	0	0	204	204	166	166	153	153	0	0	207	207	197	199
AAS10	AalbaekStampemoelle2021	Ålbæk Stampemølle	55.01	8.65	2021	Contemporary	100	100	109	109	101	101	131	140	0	0	0	0	204	204	166	186	153	153	0	0	207	207	199	199
AAS11	AalbaekStampemoelle2021	Ålbæk Stampemølle	55.01	8.65	2021	Contemporary	96	100	109	111	101	101	131	143	127	127	0	0	204	204	166	186	153	153	0	0	207	207	199	199
AAS12	AalbaekStampemoelle2021	Ålbæk Stampemølle	55.01	8.65	2021	Contemporary	96	96	111	111	105	105	0	0	127	129	0	0	204	204	166	186	153	153	0	0	207	207	0	0
AAS13	AalbaekStampemoelle2021	Ålbæk Stampemølle	55.01	8.65	2021	Contemporary	96	96	111	111	105	105	131	140	103	119	0	0	204	204	166	166	153	153	0	0	207	207	199	199
AAS14	AalbaekStampemoelle2021	Ålbæk Stampemølle	55.01	8.65	2021	Contemporary	96	96	111	111	105	105	131	134	103	119	0	0	204	204	166	186	153	153	0	0	207	207	199	199
AAS15	AalbaekStampemoelle2021	Ålbæk Stampemølle	55.01	8.65	2021	Contemporary	96	96	111	111	101	101	131	131	99	99	0	0	204	204	166	186	153	153	0	0	207	207	199	199
AAS16	AalbaekStampemoelle2021	Ålbæk Stampemølle	55.01	8.65	2021	Contemporary	96	100	109	111	101	101	143	143	0	0	0	0	204	204	166	186	153	153	0	0	207	207	199	199
ALS_2018_20	ALS2018	ALS (Læsø)	57.23	11.01	2018	Contemporary	106	106	109	111	101	101	134	164	0	0	192	200	212	212	186	188	153	155	212	212	0	0	199	199
ALS_2018_21	ALS2018	ALS (Læsø)	57.23	11.01	2018	Contemporary	96	96	109	109	101	105	164	164	0	0	192	192	206	216	184	186	153	155	0	0	0	0	199	199
ALS_2018_22	ALS2018	ALS (Læsø)	57.23	11.01	2018	Combined	0	0	111	111	101	105	0	0	-	-	-	-	-	-	-	-	-	-	-	-	-	-	-	-
ALS_2018_23	ALS2018	ALS (Læsø)	57.23	11.01	2018	Contemporary	98	98	111	111	101	105	164	164	0	0	200	200	216	216	0	0	155	155	0	0	0	0	199	199
ALS_2018_24	ALS2018	ALS (Læsø)	57.23	11.01	2018	Contemporary	98	106	111	111	101	105	164	164	0	0	200	200	204	216	192	192	153	155	0	0	0	0	199	199
ALS_2018_25	ALS2018	ALS (Læsø)	57.23	11.01	2018	Contemporary	96	106	109	111	101	105	164	164	0	0	192	200	0	0	168	194	153	153	214	218	0	0	199	199
ALS_2018_26	ALS2018	ALS (Læsø)	57.23	11.01	2018	Contemporary	98	98	109	111	101	101	134	134	0	0	192	200	0	0	186	186	153	155	212	216	0	0	199	199
ALS_2018_27	ALS2018	ALS (Læsø)	57.23	11.01	2018	Contemporary	98	106	109	111	101	105	134	164	0	0	192	200	212	216	166	182	153	153	216	216	0	0	199	199
ALS_2018_28	ALS2018	ALS (Læsø)	57.23	11.01	2018	Contemporary	106	106	109	111	105	105	134	164	0	0	192	200	212	216	186	186	153	153	218	218	0	0	199	199
ALS_2018_29	ALS2018	ALS (Læsø)	57.23	11.01	2018	Contemporary	96	106	109	109	101	105	167	167	0	0	192	222	206	212	162	186	153	153	214	214	0	0	199	199
NHMD-227409	Fanoe1923	Fanø	55.4	8.43	1923	Historical	108	110	0	0	105	105	0	0
NHMD-227442	Fanoe1923	Fanø	55.4	8.43	1923	Historical	98	110	111	111	101	105	131	134
NHMD-227557	Fanoe1923	Fanø	55.4	8.43	1923	Historical	96	98	111	111	101	105	134	140
NHMD-227579	Fanoe1923	Fanø	55.4	8.43	1923	Historical	96	96	111	111	101	105	0	0
NHMD-227604	Fanoe1923	Fanø	55.4	8.43	1923	Historical	100	104	109	111	101	101	131	134
NHMD-227689	Fanoe1923	Fanø	55.4	8.43	1923	Historical	96	96	111	111	101	105	134	164
NHMD-227715	Fanoe1923	Fanø	55.4	8.43	1923	Historical	104	104	111	111	101	105	134	134
NHMD-227716	Fanoe1923	Fanø	55.4	8.43	1923	Historical	96	102	109	111	101	105	134	134
NHMD-227744	Fanoe1923	Fanø	55.4	8.43	1923	Historical	96	104	109	111	101	105	131	140
NHMD-227783	Fanoe1923	Fanø	55.4	8.43	1923	Historical	102	104	109	111	101	105	131	134
NHMD-227790	Fanoe1923	Fanø	55.4	8.43	1923	Historical	104	104	109	109	101	105	131	140
NHMD-227791	Fanoe1923	Fanø	55.4	8.43	1923	Historical	96	96	111	111	101	105	134	134
NHMD-227806	Fanoe1923	Fanø	55.4	8.43	1923	Historical	96	104	109	109	105	105	131	140
NHMD-227397	Fanoe1949	Fanø	55.4	8.43	1949	Historical	96	96	117	117	101	105	134	143
NHMD-227418	Fanoe1949	Fanø	55.4	8.43	1949	Historical	96	96	111	111	101	101	0	0
NHMD-227581	Fanoe1949	Fanø	55.4	8.43	1949	Historical	104	104	111	111	105	105	0	0
NHMD-227593	Fanoe1949	Fanø	55.4	8.43	1949	Historical	96	96	109	109	101	105	134	143
NHMD-227612	Fanoe1949	Fanø	55.4	8.43	1949	Historical	96	96	111	111	101	101	0	0
NHMD-227624	Fanoe1949	Fanø	55.4	8.43	1949	Historical	96	104	111	117	101	105	134	140
NHMD-227638	Fanoe1949	Fanø	55.4	8.43	1949	Historical	96	104	109	111	105	105	134	164
NHMD-227675	Fanoe1949	Fanø	55.4	8.43	1949	Historical	96	96	109	117	101	105	131	143
NHMD-227714	Fanoe1949	Fanø	55.4	8.43	1949	Historical	98	98	0	0	101	105	134	134
NHMD-227728	Fanoe1949	Fanø	55.4	8.43	1949	Historical	96	96	109	111	105	105	0	0
NHMD-227731	Fanoe1949	Fanø	55.4	8.43	1949	Historical	96	110	109	109	101	105	140	140
NHMD-227736	Fanoe1949	Fanø	55.4	8.43	1949	Historical	96	96	109	111	105	105	131	164
NHMD-227737	Fanoe1949	Fanø	55.4	8.43	1949	Historical	96	110	109	111	101	105	164	167
NHMD-227742	Fanoe1949	Fanø	55.4	8.43	1949	Historical	96	100	109	109	101	105	140	140
NHMD-227745	Fanoe1949	Fanø	55.4	8.43	1949	Historical	102	104	109	111	101	105	131	167
F_K2019_10	Fanoe2019	Fanø	55.4	8.43	2019	Contemporary	102	112	101	111	101	101	131	131	0	0	198	198	208	212	166	166	155	155	214	216	0	0	199	199
F2019_01	Fanoe2019	Fanø	55.4	8.43	2019	Contemporary	102	112	111	117	105	105	131	134	0	0	202	202	208	212	166	174	153	153	212	216	0	0	197	199
F2019_02	Fanoe2019	Fanø	55.4	8.43	2019	Contemporary	98	106	111	111	101	105	134	134	0	0	198	198	208	212	166	190	153	153	212	216	0	0	199	199
F2019_03	Fanoe2019	Fanø	55.4	8.43	2019	Contemporary	102	106	109	111	101	105	131	134	0	0	194	194	204	204	166	174	153	153	212	214	0	0	199	199
F2019_04	Fanoe2019	Fanø	55.4	8.43	2019	Contemporary	98	112	109	117	101	105	134	134	0	0	194	202	212	212	166	166	153	153	212	214	0	0	199	199
F2019_05	Fanoe2019	Fanø	55.4	8.43	2019	Contemporary	112	112	109	111	105	105	131	134	0	0	194	194	204	204	166	174	153	153	214	214	0	0	199	199
F2019_06	Fanoe2019	Fanø	55.4	8.43	2019	Contemporary	98	112	111	117	105	105	134	134	0	0	198	198	212	212	166	166	153	153	212	212	0	0	199	199
F2019_07	Fanoe2019	Fanø	55.4	8.43	2019	Contemporary	98	106	111	111	105	105	131	134	0	0	198	198	208	212	166	190	153	153	212	216	0	0	199	199
F2019_08	Fanoe2019	Fanø	55.4	8.43	2019	Contemporary	98	112	109	111	105	105	134	134	0	0	198	198	204	212	166	174	153	153	212	214	0	0	199	199
F2019_09	Fanoe2019	Fanø	55.4	8.43	2019	Contemporary	112	112	109	111	101	105	134	134	0	0	194	200	204	208	166	190	153	153	214	214	0	0	197	199
F2019_10	Fanoe2019	Fanø	55.4	8.43	2019	Contemporary	98	112	111	117	105	105	134	134	0	0	198	202	204	212	166	174	153	153	0	0	0	0	199	199
F2019_11	Fanoe2019	Fanø	55.4	8.43	2019	Contemporary	98	112	109	111	105	105	134	134	0	0	198	198	212	212	166	166	153	153	212	212	0	0	197	199
F2019_12	Fanoe2019	Fanø	55.4	8.43	2019	Contemporary	106	112	111	111	105	105	134	134	0	0	198	198	204	212	166	174	153	153	212	212	0	0	197	199
F2019_13	Fanoe2019	Fanø	55.4	8.43	2019	Contemporary	112	112	109	117	101	105	134	134	0	0	194	202	204	212	166	174	153	153	0	0	0	0	199	199
F2019_14	Fanoe2019	Fanø	55.4	8.43	2019	Contemporary	98	106	111	117	105	105	134	134	0	0	202	202	208	212	166	174	153	153	0	0	0	0	199	199
F2019_15	Fanoe2019	Fanø	55.4	8.43	2019	Contemporary	112	112	109	117	101	105	134	134	0	0	194	202	204	204	174	174	153	153	0	0	0	0	199	199
F2019_16	Fanoe2019	Fanø	55.4	8.43	2019	Contemporary	98	98	111	111	105	105	134	134	0	0	198	198	208	212	166	166	153	153	212	216	0	0	199	199
F2019_17	Fanoe2019	Fanø	55.4	8.43	2019	Contemporary	98	112	111	111	105	105	134	134	0	0	198	198	212	212	166	166	153	153	212	212	0	0	199	199
F2019_18	Fanoe2019	Fanø	55.4	8.43	2019	Contemporary	106	112	109	117	101	105	134	134	0	0	194	202	204	212	166	174	153	155	212	214	0	0	199	199
F2019_19	Fanoe2019	Fanø	55.4	8.43	2019	Contemporary	106	112	111	111	105	105	134	134	0	0	198	198	204	212	166	174	153	153	212	212	0	0	197	199
F2019_20	Fanoe2019	Fanø	55.4	8.43	2019	Contemporary	106	112	109	117	105	105	134	134	0	0	202	202	212	212	166	166	153	153	212	214	0	0	197	199
F2019_21	Fanoe2019	Fanø	55.4	8.43	2019	Contemporary	106	112	109	109	105	105	134	134	0	0	194	194	204	212	166	174	153	155	214	214	0	0	199	199
F2019_22	Fanoe2019	Fanø	55.4	8.43	2019	Contemporary	98	112	109	111	101	105	134	134	0	0	194	198	212	212	166	166	153	153	212	214	0	0	199	199
F2019_23	Fanoe2019	Fanø	55.4	8.43	2019	Contemporary	98	102	111	111	101	105	134	134	0	0	198	198	208	212	166	190	153	153	212	216	0	0	199	199
F2019_24	Fanoe2019	Fanø	55.4	8.43	2019	Contemporary	98	112	109	117	105	105	134	134	0	0	202	202	212	212	166	166	153	153	212	214	0	0	197	199
F2019_25	Fanoe2019	Fanø	55.4	8.43	2019	Contemporary	106	112	111	111	105	105	134	134	0	0	198	198	212	212	166	166	153	153	212	212	0	0	199	199
F2019_26	Fanoe2019	Fanø	55.4	8.43	2019	Contemporary	112	112	109	109	101	105	131	134	0	0	194	194	204	204	174	174	153	153	214	214	0	0	199	199
F2019_27	Fanoe2019	Fanø	55.4	8.43	2019	Contemporary	98	112	111	111	105	105	134	134	0	0	198	198	204	212	166	174	153	153	212	212	0	0	197	199
F2019_28	Fanoe2019	Fanø	55.4	8.43	2019	Contemporary	106	112	109	117	101	105	134	134	0	0	194	202	204	212	166	166	153	153	214	214	0	0	199	199
X_K2019_09	Fanoe2019	Fanø	55.4	8.43	2019	Contemporary	106	112	109	117	99	103	131	131	0	0	196	204	212	212	166	166	153	153	212	216	0	0	197	199
NHMA-ENT-199448	FroeslevMose1934	Frøslev Mose	54.82	9.25	1934	Historical	96	100	109	109	105	105	140	140
NHMA-ENT-199449	FroeslevMose1934	Frøslev Mose	54.82	9.25	1934	Historical	96	100	109	109	101	105	0	0
NHMA-ENT-199450	FroeslevMose1934	Frøslev Mose	54.82	9.25	1934	Historical	96	104	109	109	105	105	134	134
NHMA-ENT-199452	FroeslevMose1934	Frøslev Mose	54.82	9.25	1934	Historical	96	104	111	111	101	105	0	0
NHMA-ENT-199453	FroeslevMose1934	Frøslev Mose	54.82	9.25	1934	Historical	100	100	109	109	101	105	131	131
NHMA-ENT-199454	FroeslevMose1934	Frøslev Mose	54.82	9.25	1934	Historical	100	104	109	109	105	105	0	0
NHMD-227577	FroeslevMose1934	Frøslev Mose	54.82	9.25	1934	Historical	100	104	109	111	101	105	131	131
NHMD-227636	FroeslevMose1934	Frøslev Mose	54.82	9.25	1934	Historical	104	104	111	111	105	105	134	161
NHMD-227662	FroeslevMose1934	Frøslev Mose	54.82	9.25	1934	Historical	104	104	111	111	105	105	134	161
NHMD-227757	FroeslevMose1934	Frøslev Mose	54.82	9.25	1934	Historical	96	96	109	109	105	105	0	0
NHMD-227814	FroeslevMose1934	Frøslev Mose	54.82	9.25	1934	Historical	96	96	109	109	101	105	140	161
FR1.14	FroeslevMose2005	Frøslev Mose	54.82	9.25	2005	Contemporary	104	110	109	111	105	105	0	0	129	129	0	0	204	216	166	166	153	155	0	0	207	207	197	197
FR1.15	FroeslevMose2005	Frøslev Mose	54.82	9.25	2005	Contemporary	96	104	111	111	105	105	131	131	0	0	0	0	204	216	166	166	153	153	0	0	207	207	0	0
FR1.16	FroeslevMose2005	Frøslev Mose	54.82	9.25	2005	Contemporary	96	110	111	111	101	105	0	0	115	115	0	0	204	204	166	166	153	153	0	0	195	195	0	0
FR1.19	FroeslevMose2005	Frøslev Mose	54.82	9.25	2005	Contemporary	98	104	0	0	101	105	131	131	101	111	0	0	204	208	166	166	153	155	0	0	195	195	0	0
FR1.20	FroeslevMose2005	Frøslev Mose	54.82	9.25	2005	Combined	96	96	0	0	101	101	0	0	-	-	-	-	-	-	-	-	-	-	-	-	-	-	-	-
FR1.22	FroeslevMose2005	Frøslev Mose	54.82	9.25	2005	Contemporary	96	96	0	0	101	101	134	134	0	0	0	0	204	208	166	166	155	155	0	0	207	207	197	197
FR1.24	FroeslevMose2005	Frøslev Mose	54.82	9.25	2005	Contemporary	96	96	111	111	105	105	164	164	103	117	0	0	204	208	166	166	153	153	0	0	207	207	0	0
FR1.26	FroeslevMose2005	Frøslev Mose	54.82	9.25	2005	Contemporary	96	96	109	109	105	105	0	0	103	117	0	0	204	204	166	190	155	155	0	0	195	195	0	0
FR1.28	FroeslevMose2005	Frøslev Mose	54.82	9.25	2005	Contemporary	96	96	111	111	105	105	131	131	119	119	0	0	204	204	0	0	153	153	0	0	195	207	0	0
FR1.29	FroeslevMose2005	Frøslev Mose	54.82	9.25	2005	Contemporary	96	96	111	111	101	101	0	0	105	119	0	0	204	204	166	190	153	153	0	0	195	195	195	195
FR1.31	FroeslevMose2005	Frøslev Mose	54.82	9.25	2005	Contemporary	96	104	111	111	105	105	0	0	105	119	0	0	204	216	166	166	155	155	0	0	195	195	0	0
FR1.32	FroeslevMose2005	Frøslev Mose	54.82	9.25	2005	Combined	96	96	111	111	101	101	134	134	-	-	-	-	-	-	-	-	-	-	-	-	-	-	-	-
FR1.33	FroeslevMose2005	Frøslev Mose	54.82	9.25	2005	Combined	96	96	111	111	101	105	0	0	-	-	-	-	-	-	-	-	-	-	-	-	-	-	-	-
FR1.4	FroeslevMose2005	Frøslev Mose	54.82	9.25	2005	Combined	98	110	111	111	101	101	131	140	-	-	-	-	-	-	-	-	-	-	-	-	-	-	-	-
FR1.6	FroeslevMose2005	Frøslev Mose	54.82	9.25	2005	Contemporary	104	110	111	111	105	105	131	131	101	111	0	0	204	204	166	166	0	0	0	0	195	195	0	0
FR1.7	FroeslevMose2005	Frøslev Mose	54.82	9.25	2005	Contemporary	98	110	109	109	101	105	131	131	111	111	0	0	0	0	166	166	153	153	0	0	195	207	0	0
NHMD-227505	Gaansager1938	Gånsager	55.21	8.88	1938	Historical	104	104	109	111	101	105	0	0
NHMD-227717	Gaansager1938	Gånsager	55.21	8.88	1938	Historical	100	100	109	111	101	101	0	0
NHMD-227840	Gaansager1938	Gånsager	55.21	8.88	1938	Historical	96	100	109	117	101	105	0	0
NHMA-ENT-199056	HammerBakker1925	Hammer Bakker	57.13	10.02	1925	Historical	96	96	0	0	0	0	131	131
NHMA-ENT-199362	HammerBakker1925	Hammer Bakker	57.13	10.02	1925	Historical	96	96	0	0	105	105	131	131
NHMA-ENT-199368	HammerBakker1925	Hammer Bakker	57.13	10.02	1925	Historical	96	104	111	111	105	105	0	0
NHMA-ENT-199375	HammerBakker1925	Hammer Bakker	57.13	10.02	1925	Historical	96	96	111	111	105	105	0	0
NHMA-ENT-199430	HammerBakker1925	Hammer Bakker	57.13	10.02	1925	Historical	96	96	0	0	101	101	0	0
NHMA-ENT-199438	HammerBakker1925	Hammer Bakker	57.13	10.02	1925	Historical	96	96	111	111	101	105	131	134
NHMA-ENT-199440	HammerBakker1925	Hammer Bakker	57.13	10.02	1925	Historical	96	96	111	111	101	105	131	131
NHMA-ENT-199441	HammerBakker1925	Hammer Bakker	57.13	10.02	1925	Historical	96	96	111	111	101	101	155	155
NHMA-ENT-199444	HammerBakker1925	Hammer Bakker	57.13	10.02	1925	Historical	96	96	111	111	101	101	131	134
NHMA-ENT-199445	HammerBakker1925	Hammer Bakker	57.13	10.02	1925	Historical	96	104	111	111	101	105	131	131
NHMD-227555	HammerBakker1925	Hammer Bakker	57.13	10.02	1925	Historical	96	104	111	111	105	105	0	0
NHMD-227830	HammerBakker1925	Hammer Bakker	57.13	10.02	1925	Historical	96	96	111	111	101	105	167	167
NHMA-ENT-199364	HammerBakker1946	Hammer Bakker	57.13	10.02	1946	Historical	96	96	111	111	105	105	164	167
NHMA-ENT-199365	HammerBakker1946	Hammer Bakker	57.13	10.02	1946	Historical	96	96	111	111	105	105	134	155
NHMA-ENT-199366	HammerBakker1946	Hammer Bakker	57.13	10.02	1946	Historical	96	96	111	111	101	101	167	167
NHMA-ENT-199367	HammerBakker1946	Hammer Bakker	57.13	10.02	1946	Historical	96	96	111	111	101	105	0	0
NHMA-ENT-199371	HammerBakker1946	Hammer Bakker	57.13	10.02	1946	Historical	96	104	111	111	101	105	134	134
NHMA-ENT-199373	HammerBakker1946	Hammer Bakker	57.13	10.02	1946	Historical	96	96	0	0	101	101	0	0
NHMA-ENT-199428	HammerBakker1946	Hammer Bakker	57.13	10.02	1946	Historical	96	96	111	111	105	105	152	164
NHMA-ENT-199429	HammerBakker1946	Hammer Bakker	57.13	10.02	1946	Historical	96	96	111	111	101	101	164	167
NHMD-227492	Hansted1954	Hansted	57.07	8.6	1954	Historical	96	104	111	111	101	105	164	164
NHMD-227504	Hansted1954	Hansted	57.07	8.6	1954	Historical	96	104	111	111	101	101	167	167
NHMD-227509	Hansted1954	Hansted	57.07	8.6	1954	Historical	96	104	111	111	105	105	164	164
NHMD-227559	Hansted1954	Hansted	57.07	8.6	1954	Historical	96	96	109	111	101	105	134	134
NHMD-227564	Hansted1954	Hansted	57.07	8.6	1954	Historical	96	104	111	111	105	105	0	0
NHMD-227565	Hansted1954	Hansted	57.07	8.6	1954	Historical	96	96	109	111	101	101	0	0
NHMD-227566	Hansted1954	Hansted	57.07	8.6	1954	Historical	96	96	111	111	101	101	164	164
NHMD-227567	Hansted1954	Hansted	57.07	8.6	1954	Historical	96	96	111	111	101	101	167	173
NHMD-227570	Hansted1954	Hansted	57.07	8.6	1954	Historical	96	96	0	0	101	101	158	164
NHMD-227571	Hansted1954	Hansted	57.07	8.6	1954	Historical	96	96	111	111	101	105	134	134
NHMD-227668	Hansted1954	Hansted	57.07	8.6	1954	Historical	96	96	111	111	101	101	131	173
NHMD-227669	Hansted1954	Hansted	57.07	8.6	1954	Historical	96	104	111	111	105	105	131	167
NHMD-227678	Hansted1954	Hansted	57.07	8.6	1954	Historical	96	96	111	111	101	105	131	134
NHMD-227723	Hansted1954	Hansted	57.07	8.6	1954	Historical	96	96	111	111	105	105	131	164
NHMD-227727	Hansted1954	Hansted	57.07	8.6	1954	Historical	96	108	0	0	101	101	131	167
NHMD-227741	Hansted1954	Hansted	57.07	8.6	1954	Historical	96	104	111	111	101	105	134	164
KC-023	Hansted1961	Hansted	57.07	8.6	1961	Historical	96	96	109	109	105	105	0	0
KC-026	Hansted1961	Hansted	57.07	8.6	1961	Historical	96	96	111	111	101	101	0	0
T2019_01	Hansted2019	Hansted	57.07	8.6	2019	Contemporary	98	98	111	111	101	105	134	164	0	0	198	200	204	212	186	196	153	155	214	214	0	0	197	199
T2019_02	Hansted2019	Hansted	57.07	8.6	2019	Contemporary	98	106	111	111	101	101	134	164	0	0	198	200	204	204	190	192	153	153	216	216	0	0	197	197
T2019_03	Hansted2019	Hansted	57.07	8.6	2019	Contemporary	98	98	111	111	101	105	134	173	0	0	200	228	204	212	184	184	153	153	214	214	0	0	199	199
T2019_04	Hansted2019	Hansted	57.07	8.6	2019	Contemporary	98	98	111	111	101	105	134	167	0	0	198	200	204	212	186	196	153	155	214	214	0	0	199	199
T2019_05	Hansted2019	Hansted	57.07	8.6	2019	Contemporary	98	98	111	111	101	105	164	173	0	0	200	200	204	204	184	186	153	153	214	216	0	0	197	199
T2019_06	Hansted2019	Hansted	57.07	8.6	2019	Contemporary	98	98	111	111	101	101	164	164	0	0	200	200	204	204	186	186	153	153	214	216	0	0	197	199
T2019_07	Hansted2019	Hansted	57.07	8.6	2019	Contemporary	98	98	111	111	101	105	134	134	0	0	200	228	204	212	166	184	153	155	214	216	0	0	197	197
T2019_08	Hansted2019	Hansted	57.07	8.6	2019	Contemporary	98	98	111	111	101	101	134	164	0	0	198	200	204	212	184	186	153	153	216	216	0	0	197	197
T2019_09	Hansted2019	Hansted	57.07	8.6	2019	Contemporary	98	98	111	111	101	101	134	173	0	0	200	228	204	212	184	184	153	153	214	214	0	0	197	199
T2019_10	Hansted2019	Hansted	57.07	8.6	2019	Contemporary	98	98	111	111	101	101	134	173	0	0	200	200	204	212	184	184	153	153	214	216	0	0	197	197
T2019_11	Hansted2019	Hansted	57.07	8.6	2019	Contemporary	98	98	111	111	101	101	134	173	0	0	200	200	204	212	184	184	153	155	0	0	0	0	197	199
T2019_12	Hansted2019	Hansted	57.07	8.6	2019	Contemporary	98	106	111	111	101	101	134	164	0	0	200	200	204	212	166	186	153	155	0	0	0	0	197	197
T2019_13	Hansted2019	Hansted	57.07	8.6	2019	Contemporary	98	106	111	111	101	101	134	164	0	0	200	200	204	204	184	192	153	155	0	0	0	0	197	199
T2019_14	Hansted2019	Hansted	57.07	8.6	2019	Contemporary	98	98	111	111	101	105	134	134	0	0	200	200	204	204	184	186	153	153	214	216	0	0	197	199
T2019_15	Hansted2019	Hansted	57.07	8.6	2019	Combined	98	98	111	111	101	105	134	134	-	-	-	-	-	-	-	-	-	-	-	-	-	-	-	-
T2019_16	Hansted2019	Hansted	57.07	8.6	2019	Combined	98	98	111	111	101	105	134	164	-	-	-	-	-	-	-	-	-	-	-	-	-	-	-	-
T2019_17	Hansted2019	Hansted	57.07	8.6	2019	Combined	98	106	0	0	101	105	134	134	-	-	-	-	-	-	-	-	-	-	-	-	-	-	-	-
T2019_18	Hansted2019	Hansted	57.07	8.6	2019	Combined	98	98	111	111	101	105	134	134	-	-	-	-	-	-	-	-	-	-	-	-	-	-	-	-
KC-081	HavrisHede1961	Havris Hede	56.52	8.79	1961	Historical	102	102	111	111	101	105	131	167
KC-082	HavrisHede1961	Havris Hede	56.52	8.79	1961	Historical	102	102	111	111	99	105	131	131
KC-083	HavrisHede1961	Havris Hede	56.52	8.79	1961	Historical	96	102	111	111	101	105	140	140
KC-100	HavrisHede1961	Havris Hede	56.52	8.79	1961	Historical	96	102	109	111	101	105	131	131
KC-101	HavrisHede1961	Havris Hede	56.52	8.79	1961	Historical	96	96	111	111	101	105	131	134
KC-102	HavrisHede1961	Havris Hede	56.52	8.79	1961	Historical	102	104	109	111	101	105	131	140
NHMD-227772	Hune1916	Hune	57.25	9.62	1916	Historical	96	96	0	0	101	105	0	0
NHMA-ENT-199138	Husby1980	Husby	56.28	8.18	1980	Historical	100	110	111	117	101	105	131	134
NHMA-ENT-199139	Husby1980	Husby	56.28	8.18	1980	Historical	104	110	109	109	101	105	167	167
NHMA-ENT-199141	Husby1980	Husby	56.28	8.18	1980	Historical	96	110	111	111	101	105	131	134
NHMA-ENT-199142	Husby1980	Husby	56.28	8.18	1980	Historical	104	110	111	111	101	105	131	167
NHMA-ENT-199143	Husby1980	Husby	56.28	8.18	1980	Historical	110	110	109	111	101	101	131	131
NHMA-ENT-199144	Husby1980	Husby	56.28	8.18	1980	Historical	104	104	109	109	105	105	134	167
NHMA-ENT-199145	Husby1980	Husby	56.28	8.18	1980	Historical	104	110	109	109	105	105	131	140
NHMA-ENT-199146	Husby1980	Husby	56.28	8.18	1980	Historical	104	104	109	109	105	105	134	134
NHMA-ENT-199147	Husby1980	Husby	56.28	8.18	1980	Historical	96	110	109	109	101	105	0	0
NHMA-ENT-199150	Husby1980	Husby	56.28	8.18	1980	Historical	96	96	109	109	101	105	131	131
NHMA-ENT-199153	Husby1980	Husby	56.28	8.18	1980	Historical	96	110	109	111	105	105	140	140
NHMA-ENT-199155	Husby1980	Husby	56.28	8.18	1980	Historical	96	104	111	111	101	105	0	0
NHMA-ENT-199257	Husby1980	Husby	56.28	8.18	1980	Historical	104	104	109	109	101	101	140	140
NHMA-ENT-199261	Husby1980	Husby	56.28	8.18	1980	Historical	98	98	0	0	101	101	134	134
NHMA-ENT-199264	Husby1980	Husby	56.28	8.18	1980	Historical	96	110	109	109	101	105	131	131
KC-010	Hvims1961	Hvims	57.57	10.37	1961	Historical	96	96	109	109	101	101	0	0
KC-039	Hvims1961	Hvims	57.57	10.37	1961	Historical	96	96	111	111	105	105	0	0
KC-040	Hvims1961	Hvims	57.57	10.37	1961	Historical	96	96	0	0	101	105	0	0
KC-042	Hvims1961	Hvims	57.57	10.37	1961	Historical	96	96	111	111	101	105	0	0
NHMA-ENT-199027	Hvims1961	Hvims	57.57	10.37	1961	Historical	96	104	111	111	101	101	131	131
NHMA-ENT-199078	Hvims1961	Hvims	57.57	10.37	1961	Historical	96	104	0	0	101	101	0	0
NHMA-ENT-199231	Hvims1961	Hvims	57.57	10.37	1961	Historical	96	104	111	111	101	105	134	158
NHMA-ENT-199235	Hvims1961	Hvims	57.57	10.37	1961	Historical	96	96	109	111	101	105	131	167
NHMA-ENT-199357	Hvims1961	Hvims	57.57	10.37	1961	Historical	96	96	111	111	101	105	134	158
NHMD-227369	Hvims1961	Hvims	57.57	10.37	1961	Historical	96	96	111	111	105	105	158	158
NHMD-227377	Hvims1961	Hvims	57.57	10.37	1961	Historical	96	96	111	111	101	101	134	134
NHMD-227405	Hvims1961	Hvims	57.57	10.37	1961	Historical	96	104	111	111	101	105	164	164
NHMD-227423	Hvims1961	Hvims	57.57	10.37	1961	Historical	96	96	109	109	101	101	131	131
NHMD-227474	Hvims1961	Hvims	57.57	10.37	1961	Historical	96	96	109	111	101	105	131	164
NHMD-227659	Hvims1961	Hvims	57.57	10.37	1961	Historical	96	96	111	111	105	105	134	134
NHMD-227433	Kandestederne1971	Kandestederne	57.66	10.39	1971	Historical	96	104	109	111	101	105	0	0
NHMD-227459	Kandestederne1971	Kandestederne	57.66	10.39	1971	Historical	104	104	111	111	101	105	158	164
NHMD-227467	Kandestederne1971	Kandestederne	57.66	10.39	1971	Historical	96	96	111	111	99	101	134	164
NHMD-227472	Kandestederne1971	Kandestederne	57.66	10.39	1971	Historical	96	104	109	111	101	105	158	173
NHMD-227477	Kandestederne1971	Kandestederne	57.66	10.39	1971	Historical	96	104	111	111	101	101	131	134
NHMD-227497	Kandestederne1971	Kandestederne	57.66	10.39	1971	Historical	96	96	111	111	101	101	131	164
NHMD-227512	Kandestederne1971	Kandestederne	57.66	10.39	1971	Historical	96	104	111	111	101	105	134	164
NHMD-227551	Kandestederne1971	Kandestederne	57.66	10.39	1971	Historical	96	96	109	111	101	105	140	140
NHMD-227597	Kandestederne1971	Kandestederne	57.66	10.39	1971	Historical	96	96	111	111	101	105	158	164
NHMD-227618	Kandestederne1971	Kandestederne	57.66	10.39	1971	Historical	96	104	109	111	101	105	131	164
NHMD-227619	Kandestederne1971	Kandestederne	57.66	10.39	1971	Historical	96	96	111	111	101	101	0	0
NHMD-227621	Kandestederne1971	Kandestederne	57.66	10.39	1971	Historical	96	96	111	111	101	101	164	164
NHMD-227627	Kandestederne1971	Kandestederne	57.66	10.39	1971	Historical	0	0	111	111	105	105	0	0
NHMD-227646	Kandestederne1971	Kandestederne	57.66	10.39	1971	Historical	96	104	111	111	101	105	134	164
NHMD-227679	Kandestederne1971	Kandestederne	57.66	10.39	1971	Historical	0	0	109	109	0	0	158	164
NHMA-ENT-199279	Klosterheden1967	Klosterheden	56.45	8.4	1967	Historical	96	96	109	111	101	101	0	0
NHMA-ENT-199280	Klosterheden1967	Klosterheden	56.45	8.4	1967	Historical	96	96	109	111	101	105	134	164
NHMA-ENT-199282	Klosterheden1967	Klosterheden	56.45	8.4	1967	Historical	96	104	111	111	101	105	134	134
NHMA-ENT-199283	Klosterheden1967	Klosterheden	56.45	8.4	1967	Historical	98	102	107	109	101	101	0	0
NHMA-ENT-199288	Klosterheden1967	Klosterheden	56.45	8.4	1967	Historical	96	104	109	111	105	105	134	164
NHMA-ENT-199289	Klosterheden1967	Klosterheden	56.45	8.4	1967	Historical	96	96	109	109	101	105	0	0
NHMA-ENT-199291	Klosterheden1967	Klosterheden	56.45	8.4	1967	Historical	96	110	109	111	101	105	134	134
NHMA-ENT-199293	Klosterheden1967	Klosterheden	56.45	8.4	1967	Historical	100	104	109	111	101	101	134	140
NHMA-ENT-199294	Klosterheden1967	Klosterheden	56.45	8.4	1967	Historical	96	96	111	111	105	105	134	164
NHMA-ENT-199295	Klosterheden1967	Klosterheden	56.45	8.4	1967	Historical	96	104	111	111	101	101	131	164
NHMA-ENT-199297	Klosterheden1967	Klosterheden	56.45	8.4	1967	Historical	96	104	109	111	101	105	134	164
NHMA-ENT-199301	Klosterheden1967	Klosterheden	56.45	8.4	1967	Historical	96	96	109	111	101	105	161	164
KH02	Klosterheden2021	Klosterheden	56.45	8.4	2021	Contemporary	104	104	111	111	101	101	134	134	99	99	0	0	204	220	166	190	153	153	0	0	207	207	197	199
KH03	Klosterheden2021	Klosterheden	56.45	8.4	2021	Contemporary	100	100	111	111	101	101	134	164	127	127	0	0	204	212	166	166	153	155	0	0	207	207	197	199
KH04	Klosterheden2021	Klosterheden	56.45	8.4	2021	Contemporary	96	100	111	111	101	101	134	164	99	127	0	0	204	220	166	190	153	153	0	0	207	207	197	197
KH05	Klosterheden2021	Klosterheden	56.45	8.4	2021	Contemporary	96	96	111	111	105	105	134	134	119	119	0	0	220	220	190	190	153	155	0	0	207	207	197	199
KH06	Klosterheden2021	Klosterheden	56.45	8.4	2021	Contemporary	96	96	111	111	101	105	134	167	103	127	0	0	212	220	158	190	153	153	0	0	207	207	199	199
KH07	Klosterheden2021	Klosterheden	56.45	8.4	2021	Contemporary	96	104	109	109	105	105	134	167	99	103	0	0	212	220	158	190	153	153	0	0	207	207	199	199
KH08	Klosterheden2021	Klosterheden	56.45	8.4	2021	Contemporary	96	96	111	111	105	105	134	134	119	127	0	0	220	232	190	190	153	153	0	0	207	207	197	199
NHMA-ENT-199341	Laesoe1934	Læsø	57.27	10.99	1934	Historical	94	110	109	109	101	105	0	0
NHMA-ENT-199346	Laesoe1934	Læsø	57.27	10.99	1934	Historical	94	94	109	109	101	105	0	0
NHMA-ENT-199403	Laesoe1934	Læsø	57.27	10.99	1934	Historical	94	110	109	109	0	0	0	0
NHMA-ENT-199414	Laesoe1934	Læsø	57.27	10.99	1934	Historical	94	110	109	109	101	105	0	0
NHMA-ENT-199415	Laesoe1934	Læsø	57.27	10.99	1934	Historical	94	110	109	109	101	105	0	0
NHMA-ENT-199417	Laesoe1934	Læsø	57.27	10.99	1934	Historical	0	0	109	109	101	105	0	0
NHMD-227380	Laesoe1956	Læsø	57.27	10.99	1956	Historical	96	104	111	111	101	101	0	0
NHMD-227453	Laesoe1956	Læsø	57.27	10.99	1956	Historical	96	104	109	111	105	105	0	0
NHMD-227482	Laesoe1956	Læsø	57.27	10.99	1956	Historical	96	96	0	0	101	101	0	0
NHMD-227511	Laesoe1956	Læsø	57.27	10.99	1956	Historical	96	96	109	111	101	105	0	0
NHMD-227576	Laesoe1956	Læsø	57.27	10.99	1956	Historical	104	104	111	111	101	105	0	0
NHMD-227677	Laesoe1956	Læsø	57.27	10.99	1956	Historical	96	104	109	109	101	101	0	0
NHMD-227373	Laesoe1964	Læsø	57.27	10.99	1964	Historical	94	110	109	109	101	105	0	0
NHMD-227379	Laesoe1964	Læsø	57.27	10.99	1964	Historical	94	102	0	0	101	105	0	0
NHMD-227386	Laesoe1964	Læsø	57.27	10.99	1964	Historical	94	94	0	0	101	105	0	0
NHMD-227404	Laesoe1964	Læsø	57.27	10.99	1964	Historical	94	94	109	109	101	105	0	0
NHMD-227452	Laesoe1964	Læsø	57.27	10.99	1964	Historical	94	94	109	109	101	105	0	0
NHMD-227635	Laesoe1964	Læsø	57.27	10.99	1964	Historical	94	94	109	109	0	0	0	0
NHMD-227683	Laesoe1964	Læsø	57.27	10.99	1964	Historical	94	94	109	109	101	105	0	0
NHMD-227800	Laesoe1964	Læsø	57.27	10.99	1964	Historical	94	94	0	0	101	105	0	0
NHMD-227803	Laesoe1964	Læsø	57.27	10.99	1964	Historical	94	94	109	109	101	105	0	0
NHMD-227804	Laesoe1964	Læsø	57.27	10.99	1964	Historical	94	94	109	109	101	105	0	0
NHMD-227808	Laesoe1964	Læsø	57.27	10.99	1964	Historical	94	94	109	109	101	105	0	0
NHMD-227809	Laesoe1964	Læsø	57.27	10.99	1964	Historical	92	94	109	109	101	105	0	0
NHMD-227810	Laesoe1964	Læsø	57.27	10.99	1964	Historical	0	0	109	109	101	105	0	0
NHMD-227451	Laesoe1976	Læsø	57.27	10.99	1976	Historical	94	94	111	111	101	105	0	0
NHMD-227488	Laesoe1976	Læsø	57.27	10.99	1976	Historical	94	94	111	111	101	105	0	0
NHMD-227518	Laesoe1976	Læsø	57.27	10.99	1976	Historical	94	94	111	111	101	101	0	0
NHMD-227519	Laesoe1976	Læsø	57.27	10.99	1976	Historical	94	94	109	109	101	105	0	0
NHMD-227520	Laesoe1976	Læsø	57.27	10.99	1976	Historical	94	94	111	111	101	101	0	0
NHMD-227521	Laesoe1976	Læsø	57.27	10.99	1976	Historical	94	94	111	111	101	101	0	0
NHMD-227524	Laesoe1976	Læsø	57.27	10.99	1976	Historical	94	94	109	111	105	105	0	0
NHMD-227535	Laesoe1976	Læsø	57.27	10.99	1976	Historical	94	94	109	109	101	105	0	0
NHMD-227573	Laesoe1976	Læsø	57.27	10.99	1976	Historical	94	102	109	111	101	101	0	0
NHMD-227575	Laesoe1976	Læsø	57.27	10.99	1976	Historical	94	94	109	111	101	101	0	0
NHMD-227589	Laesoe1976	Læsø	57.27	10.99	1976	Historical	94	94	109	109	0	0	0	0
NHMD-227599	Laesoe1976	Læsø	57.27	10.99	1976	Historical	94	94	109	111	101	101	0	0
NHMD-227724	Laesoe1976	Læsø	57.27	10.99	1976	Historical	94	102	111	111	101	105	0	0
KC-021	LegindBjerge1961	Legind Bjerge	56.8	8.86	1961	Historical	96	104	109	109	101	105	0	0
KC-028	LegindBjerge1961	Legind Bjerge	56.8	8.86	1961	Historical	96	104	109	109	101	105	0	0
KC-029	LegindBjerge1961	Legind Bjerge	56.8	8.86	1961	Historical	96	104	111	111	101	105	0	0
KC-030	LegindBjerge1961	Legind Bjerge	56.8	8.86	1961	Historical	96	104	109	109	101	101	0	0
KC-031	LegindBjerge1961	Legind Bjerge	56.8	8.86	1961	Historical	96	104	109	111	101	105	0	0
KC-032	LegindBjerge1961	Legind Bjerge	56.8	8.86	1961	Historical	96	104	0	0	101	101	0	0
KC-058	LegindBjerge1961	Legind Bjerge	56.8	8.86	1961	Historical	96	104	109	111	101	105	0	0
KC-059	LegindBjerge1961	Legind Bjerge	56.8	8.86	1961	Historical	104	104	111	111	101	101	0	0
KC-060	LegindBjerge1961	Legind Bjerge	56.8	8.86	1961	Historical	96	96	111	111	101	101	0	0
KC-061	LegindBjerge1961	Legind Bjerge	56.8	8.86	1961	Historical	96	104	109	111	101	105	0	0
KC-062	LegindBjerge1961	Legind Bjerge	56.8	8.86	1961	Historical	96	104	109	109	101	105	0	0
KC-063	LegindBjerge1961	Legind Bjerge	56.8	8.86	1961	Historical	96	104	111	111	101	101	0	0
KC-064	LegindBjerge1961	Legind Bjerge	56.8	8.86	1961	Historical	96	96	111	111	101	105	0	0
KC-065	LegindBjerge1961	Legind Bjerge	56.8	8.86	1961	Historical	96	104	111	111	101	105	0	0
KC-087	LemHede1961	Lem Hede	56.61	8.75	1961	Historical	96	96	109	111	101	105	0	0
KC-088	LemHede1961	Lem Hede	56.61	8.75	1961	Historical	96	96	111	111	105	105	0	0
KC-089	LemHede1961	Lem Hede	56.61	8.75	1961	Historical	96	104	109	109	105	105	0	0
KC-090	LemHede1961	Lem Hede	56.61	8.75	1961	Historical	96	104	109	111	105	105	0	0
KC-091	LemHede1961	Lem Hede	56.61	8.75	1961	Historical	96	104	111	111	105	105	0	0
KC-094	LemHede1961	Lem Hede	56.61	8.75	1961	Historical	96	104	111	111	105	105	0	0
KC-095	LemHede1961	Lem Hede	56.61	8.75	1961	Historical	96	96	111	111	101	105	0	0
KC-096	LemHede1961	Lem Hede	56.61	8.75	1961	Historical	96	96	111	111	101	105	0	0
KC-097	LemHede1961	Lem Hede	56.61	8.75	1961	Historical	96	104	109	111	101	101	0	0
KC-098	LemHede1961	Lem Hede	56.61	8.75	1961	Historical	96	96	111	111	101	105	0	0
KC-099	LemHede1961	Lem Hede	56.61	8.75	1961	Historical	104	104	109	111	105	105	0	0
NHMA-ENT-199090	Lendrup1973	Lendrup	56.94	9.22	1973	Historical	96	96	109	111	101	101	134	167
NHMA-ENT-199353	LilleVildmose1941	Lille Vildmose	56.89	10.22	1941	Historical	98	110	0	0	105	105	0	0
LN_2018_11	LN2018	LN (Læsø)	57.23	11.01	2018	Contemporary	98	106	111	111	101	105	134	164	0	0	200	200	0	0	186	188	153	153	0	0	0	0	199	199
LN_2018_12	LN2018	LN (Læsø)	57.23	11.01	2018	Combined	98	98	111	111	101	105	134	164	-	-	-	-	-	-	-	-	-	-	-	-	-	-	-	-
LN_2018_13	LN2018	LN (Læsø)	57.23	11.01	2018	Contemporary	106	106	109	109	101	105	134	170	0	0	192	192	206	206	168	194	153	153	214	214	0	0	199	199
LN_2018_14	LN2018	LN (Læsø)	57.23	11.01	2018	Contemporary	98	106	109	111	101	101	152	155	0	0	192	200	208	208	208	208	153	155	214	218	0	0	0	0
LN_2018_15	LN2018	LN (Læsø)	57.23	11.01	2018	Contemporary	96	96	109	111	101	101	0	0	0	0	192	200	206	206	186	196	153	155	0	0	0	0	199	199
LN_2018_16	LN2018	LN (Læsø)	57.23	11.01	2018	Combined	96	106	111	111	101	101	134	134	-	-	-	-	-	-	-	-	-	-	-	-	-	-	-	-
LN_2018_17	LN2018	LN (Læsø)	57.23	11.01	2018	Contemporary	96	96	109	111	101	101	134	164	0	0	192	200	0	0	186	192	155	155	218	218	0	0	199	199
LN_2018_18	LN2018	LN (Læsø)	57.23	11.01	2018	Combined	96	96	111	111	101	101	134	164	-	-	-	-	-	-	-	-	-	-	-	-	-	-	-	-
LN_2018_19	LN2018	LN (Læsø)	57.23	11.01	2018	Contemporary	98	98	109	111	101	101	134	164	0	0	192	200	216	216	186	186	153	155	0	0	0	0	199	199
LN_2018_30	LN2018	LN (Læsø)	57.23	11.01	2018	Contemporary	98	98	111	111	101	101	164	164	0	0	200	200	204	216	186	188	155	155	0	0	0	0	199	199
Ln_2018_31	LN2018	LN (Læsø)	57.23	11.01	2018	Contemporary	96	96	111	111	99	99	134	164	0	0	200	200	216	220	186	186	153	155	212	216	0	0	199	199
LN_2018_32	LN2018	LN (Læsø)	57.23	11.01	2018	Contemporary	98	106	111	111	101	101	134	164	0	0	200	200	204	216	166	186	153	153	0	0	0	0	199	199
LN_2018_33	LN2018	LN (Læsø)	57.23	11.01	2018	Contemporary	96	96	109	111	101	101	152	152	0	0	192	200	0	0	196	208	153	153	214	218	0	0	0	0
LN_2018_34	LN2018	LN (Læsø)	57.23	11.01	2018	Contemporary	96	106	111	111	101	101	134	134	0	0	200	200	206	212	186	188	153	155	0	0	0	0	199	199
LN_2018_35	LN2018	LN (Læsø)	57.23	11.01	2018	Contemporary	98	106	109	111	101	101	134	134	0	0	192	200	204	204	186	194	153	155	0	0	0	0	199	199
LN_2018_36	LN2018	LN (Læsø)	57.23	11.01	2018	Contemporary	98	98	111	111	101	105	134	134	0	0	200	200	0	0	166	194	155	155	0	0	0	0	199	199
LN_2018_37	LN2018	LN (Læsø)	57.23	11.01	2018	Contemporary	96	96	109	111	101	101	152	155	0	0	192	200	0	0	196	208	153	155	214	218	0	0	0	0
LN_2018_38	LN2018	LN (Læsø)	57.23	11.01	2018	Contemporary	98	106	109	111	101	101	134	170	0	0	192	200	204	204	186	196	153	155	212	230	0	0	199	199
LN_2018_39	LN2018	LN (Læsø)	57.23	11.01	2018	Contemporary	106	106	109	111	101	101	134	134	0	0	192	200	204	212	186	186	155	155	212	216	0	0	199	199
LN_2018_40	LN2018	LN (Læsø)	57.23	11.01	2018	Contemporary	96	96	111	111	105	105	164	164	0	0	200	200	206	216	168	186	153	153	214	218	0	0	199	199
LH01	LoenborgHede2021	Lønborg Hede	55.86	8.45	2021	Contemporary	110	110	111	111	101	105	140	167	0	0	0	0	204	204	166	166	153	153	0	0	0	0	199	199
LH02	LoenborgHede2021	Lønborg Hede	55.86	8.45	2021	Contemporary	104	104	109	109	101	101	131	167	125	125	0	0	204	204	166	188	153	155	0	0	195	195	199	199
LH03	LoenborgHede2021	Lønborg Hede	55.86	8.45	2021	Contemporary	104	110	109	111	101	105	167	167	125	125	0	0	204	204	166	166	153	155	0	0	195	203	199	199
LH04	LoenborgHede2021	Lønborg Hede	55.86	8.45	2021	Contemporary	110	110	109	111	101	105	140	167	125	125	0	0	204	204	166	188	153	155	0	0	195	195	199	199
LH05	LoenborgHede2021	Lønborg Hede	55.86	8.45	2021	Contemporary	102	110	111	111	105	105	131	131	123	125	0	0	204	212	166	166	153	155	0	0	207	207	199	199
LH06	LoenborgHede2021	Lønborg Hede	55.86	8.45	2021	Contemporary	96	98	109	111	101	105	131	131	123	125	0	0	208	212	166	166	153	155	0	0	207	207	199	199
LH07	LoenborgHede2021	Lønborg Hede	55.86	8.45	2021	Contemporary	96	104	109	111	105	105	140	140	101	101	0	0	204	208	166	166	153	155	0	0	207	207	199	199
LH08	LoenborgHede2021	Lønborg Hede	55.86	8.45	2021	Contemporary	96	104	109	109	101	101	131	140	101	125	0	0	204	204	166	188	153	155	0	0	207	207	199	199
LH09	LoenborgHede2021	Lønborg Hede	55.86	8.45	2021	Contemporary	96	102	109	109	101	101	167	167	101	101	0	0	204	204	166	188	153	155	0	0	207	207	199	199
LS_2018_41	LS2018	LS (Læsø)	57.23	11.01	2018	Combined	96	96	111	111	101	101	134	164	-	-	-	-	-	-	-	-	-	-	-	-	-	-	-	-
LS_2018_42	LS2018	LS (Læsø)	57.23	11.01	2018	Contemporary	96	106	109	111	101	105	164	164	0	0	192	200	0	0	184	186	153	155	218	218	0	0	199	199
LS_2018_43	LS2018	LS (Læsø)	57.23	11.01	2018	Contemporary	96	96	109	111	105	105	134	134	0	0	192	200	206	206	186	188	153	155	214	214	0	0	199	199
LS_2018_44	LS2018	LS (Læsø)	57.23	11.01	2018	Contemporary	96	96	109	111	101	105	152	155	0	0	192	200	0	0	208	208	153	155	214	214	0	0	0	0
LS_2018_45	LS2018	LS (Læsø)	57.23	11.01	2018	Combined	96	106	0	0	99	103	0	0	-	-	-	-	-	-	-	-	-	-	-	-	-	-	-	-
LS_2018_46	LS2018	LS (Læsø)	57.23	11.01	2018	Contemporary	96	96	111	111	101	105	134	134	0	0	200	200	206	212	186	186	153	155	214	218	0	0	199	199
LS_2018_47	LS2018	LS (Læsø)	57.23	11.01	2018	Combined	96	96	111	111	101	105	164	164	-	-	-	-	-	-	-	-	-	-	-	-	-	-	-	-
LS_2018_48	LS2018	LS (Læsø)	57.23	11.01	2018	Contemporary	106	106	111	111	99	103	134	164	0	0	200	200	204	212	188	192	153	155	212	216	0	0	199	199
LS_2018_49	LS2018	LS (Læsø)	57.23	11.01	2018	Contemporary	98	98	111	111	101	105	134	164	0	0	200	200	204	212	166	186	153	155	216	230	0	0	199	199
LS_2018_50	LS2018	LS (Læsø)	57.23	11.01	2018	Contemporary	98	98	109	111	105	105	134	134	0	0	192	200	0	0	186	186	153	155	0	0	0	0	199	199
KC-108	Oksby1961	Oksby	55.58	8.18	1961	Historical	102	104	111	111	101	105	0	0
KC-109	Oksby1961	Oksby	55.58	8.18	1961	Historical	96	104	109	109	105	105	131	134
KC-111	Oksby1961	Oksby	55.58	8.18	1961	Historical	96	102	109	111	101	105	131	140
KC-113	Oksby1961	Oksby	55.58	8.18	1961	Historical	96	102	109	111	105	105	0	0
KC-115	Oksby1961	Oksby	55.58	8.18	1961	Historical	96	102	109	111	101	105	140	140
KC-116	Oksby1961	Oksby	55.58	8.18	1961	Historical	96	102	107	109	105	105	131	140
KC-118	Oksby1961	Oksby	55.58	8.18	1961	Historical	96	96	107	111	0	0	131	131
NHMD-227746	Oesterild1930	Østerild	57.05	8.89	1930	Historical	96	96	111	111	101	101	0	0
R2019_01	Roemoe2019	Rømø	55.13	8.52	2019	Contemporary	106	112	109	111	101	101	131	131	0	0	194	198	204	212	166	174	153	155	214	216	0	0	197	199
R2019_02	Roemoe2019	Rømø	55.13	8.52	2019	Contemporary	102	106	109	109	105	105	131	131	0	0	194	194	212	212	166	166	153	153	216	216	0	0	199	199
R2019_03	Roemoe2019	Rømø	55.13	8.52	2019	Contemporary	112	112	109	109	101	105	131	131	0	0	194	194	204	208	166	174	153	153	212	216	0	0	199	199
R2019_04	Roemoe2019	Rømø	55.13	8.52	2019	Contemporary	102	112	109	109	105	105	131	131	0	0	194	194	208	212	166	166	153	153	212	216	0	0	197	199
R2019_05	Roemoe2019	Rømø	55.13	8.52	2019	Contemporary	106	106	109	111	101	105	131	131	0	0	194	198	204	212	166	174	153	153	214	216	0	0	197	199
R2019_06	Roemoe2019	Rømø	55.13	8.52	2019	Contemporary	106	106	109	111	101	105	131	131	0	0	194	198	208	212	166	166	153	155	214	216	0	0	199	199
R2019_07	Roemoe2019	Rømø	55.13	8.52	2019	Contemporary	106	106	109	109	101	105	131	131	0	0	190	194	204	212	166	174	153	155	214	216	0	0	199	199
R2019_08	Roemoe2019	Rømø	55.13	8.52	2019	Contemporary	106	106	111	117	101	101	131	131	0	0	198	202	204	212	166	174	153	153	212	216	0	0	199	199
R2019_09	Roemoe2019	Rømø	55.13	8.52	2019	Contemporary	102	112	109	111	105	105	131	134	0	0	190	200	212	212	158	166	153	153	214	216	0	0	197	199
R2019_10	Roemoe2019	Rømø	55.13	8.52	2019	Contemporary	106	106	111	117	101	105	131	131	0	0	198	202	204	212	166	174	153	155	214	216	0	0	199	199
X_K2019_01	Roemoe2019	Rømø	55.13	8.52	2019	Contemporary	98	106	109	117	101	105	134	143	0	0	194	202	204	204	174	182	153	153	212	214	0	0	199	199
X_K2019_02	Roemoe2019	Rømø	55.13	8.52	2019	Contemporary	96	106	109	117	105	105	152	155	0	0	194	202	0	0	196	196	153	155	218	218	0	0	0	0
X_K2019_03	Roemoe2019	Rømø	55.13	8.52	2019	Contemporary	106	106	109	117	105	105	152	152	0	0	194	202	208	208	196	208	153	153	216	218	0	0	0	0
X_K2019_05	Roemoe2019	Rømø	55.13	8.52	2019	Contemporary	98	112	111	111	105	105	134	140	0	0	198	198	208	208	168	168	153	155	218	218	0	0	199	199
XO_K2019_07	Roemoe2019	Rømø	55.13	8.52	2019	Contemporary	102	112	109	109	103	103	140	143	0	0	222	222	204	208	166	166	153	155	214	216	0	0	199	199
NHMA-ENT-199109	Slettestrand1941	Slettestrand	57.15	9.37	1941	Historical	96	96	111	111	101	101	131	134
NHMA-ENT-199110	Slettestrand1941	Slettestrand	57.15	9.37	1941	Historical	104	104	0	0	105	105	0	0
NHMA-ENT-199111	Slettestrand1941	Slettestrand	57.15	9.37	1941	Historical	96	104	109	111	101	101	131	131
NHMA-ENT-199112	Slettestrand1941	Slettestrand	57.15	9.37	1941	Historical	96	96	111	111	101	101	134	134
NHMA-ENT-199113	Slettestrand1941	Slettestrand	57.15	9.37	1941	Historical	96	96	109	111	101	101	0	0
NHMA-ENT-199114	Slettestrand1941	Slettestrand	57.15	9.37	1941	Historical	96	96	111	111	105	105	0	0
NHMA-ENT-199115	Slettestrand1941	Slettestrand	57.15	9.37	1941	Historical	96	96	111	111	101	101	0	0
NHMA-ENT-199116	Slettestrand1941	Slettestrand	57.15	9.37	1941	Historical	96	96	111	111	101	105	134	134
NHMA-ENT-199118	Slettestrand1941	Slettestrand	57.15	9.37	1941	Historical	96	104	111	111	101	105	131	131
NHMA-ENT-199119	Slettestrand1941	Slettestrand	57.15	9.37	1941	Historical	96	96	111	111	105	105	134	134
NHMA-ENT-199120	Slettestrand1941	Slettestrand	57.15	9.37	1941	Historical	104	104	111	111	105	105	0	0
NHMA-ENT-199121	Slettestrand1941	Slettestrand	57.15	9.37	1941	Historical	104	104	0	0	103	105	0	0
NHMA-ENT-199124	Slettestrand1941	Slettestrand	57.15	9.37	1941	Historical	96	96	109	109	101	105	134	134
NHMA-ENT-199125	Slettestrand1941	Slettestrand	57.15	9.37	1941	Historical	96	96	111	111	101	101	134	167
NHMA-ENT-199126	Slettestrand1941	Slettestrand	57.15	9.37	1941	Historical	96	96	111	111	101	105	131	131
SS01	SoerupSande2021	Sørup Sande	56.17	8.38	2021	Contemporary	96	102	109	111	101	105	131	140	99	129	0	0	208	208	166	166	153	153	0	0	207	207	199	199
SS02	SoerupSande2021	Sørup Sande	56.17	8.38	2021	Contemporary	98	102	109	109	105	105	164	164	127	127	0	0	204	212	166	166	153	153	0	0	195	195	199	199
EM01	TverstedRimmer2021	Tversted Rimmer	57.57	10.25	2021	Contemporary	96	96	111	111	101	101	134	134	119	119	0	0	204	204	166	186	153	155	0	0	207	207	199	199
EM02	TverstedRimmer2021	Tversted Rimmer	57.57	10.25	2021	Contemporary	96	96	111	111	101	101	134	164	119	119	0	0	204	204	166	186	153	155	0	0	207	207	199	199
EM04	TverstedRimmer2021	Tversted Rimmer	57.57	10.25	2021	Contemporary	96	96	111	111	101	101	164	164	119	119	0	0	204	204	166	166	153	153	0	0	207	207	199	199
EM05	TverstedRimmer2021	Tversted Rimmer	57.57	10.25	2021	Contemporary	96	96	111	111	101	101	134	134	119	119	0	0	204	204	166	166	153	155	0	0	207	207	199	199
EM06	TverstedRimmer2021	Tversted Rimmer	57.57	10.25	2021	Contemporary	96	96	111	111	101	101	134	164	119	119	0	0	204	204	166	166	153	155	0	0	207	207	199	199
EM07	TverstedRimmer2021	Tversted Rimmer	57.57	10.25	2021	Contemporary	96	96	111	111	101	101	164	164	119	119	0	0	204	204	166	186	153	155	0	0	207	207	199	199
EM08	TverstedRimmer2021	Tversted Rimmer	57.57	10.25	2021	Contemporary	96	96	111	111	101	101	134	164	119	119	0	0	204	204	166	166	153	155	0	0	0	0	199	199
EM09	TverstedRimmer2021	Tversted Rimmer	57.57	10.25	2021	Contemporary	96	96	111	111	101	101	164	164	119	119	0	0	204	204	166	186	153	155	0	0	207	207	199	199
EM10	TverstedRimmer2021	Tversted Rimmer	57.57	10.25	2021	Contemporary	96	96	111	111	101	101	134	134	119	119	0	0	204	204	186	186	153	153	0	0	207	207	199	199
EM11	TverstedRimmer2021	Tversted Rimmer	57.57	10.25	2021	Contemporary	96	96	111	111	101	101	134	134	119	119	0	0	204	204	166	166	153	153	0	0	207	207	199	199
EM12	TverstedRimmer2021	Tversted Rimmer	57.57	10.25	2021	Contemporary	96	96	111	111	101	101	134	164	119	119	0	0	204	204	166	166	153	155	0	0	207	207	199	199
EM13	TverstedRimmer2021	Tversted Rimmer	57.57	10.25	2021	Contemporary	96	96	111	111	101	101	134	164	119	119	0	0	204	204	166	186	153	155	0	0	207	207	199	199
EM14	TverstedRimmer2021	Tversted Rimmer	57.57	10.25	2021	Contemporary	96	96	111	111	101	101	134	164	119	119	0	0	204	204	166	166	153	155	0	0	207	207	199	199
EM15	TverstedRimmer2021	Tversted Rimmer	57.57	10.25	2021	Contemporary	96	96	111	111	101	101	164	164	119	119	0	0	204	204	166	166	153	155	0	0	207	207	199	199
EM16	TverstedRimmer2021	Tversted Rimmer	57.57	10.25	2021	Contemporary	96	96	111	111	101	101	164	164	119	119	0	0	204	204	166	166	153	155	0	0	207	207	199	199
NHMA-ENT-199427	UdbyhoejSyd1949	Udbyhøj Syd	56.61	10.3	1949	Historical	100	110	111	111	101	105	134	134
X_K2019_08	Vejers2019	Vejers	55.61	8.21	2019	Contemporary	106	106	0	0	105	105	134	140	0	0	198	222	0	0	168	168	155	155	0	0	0	0	199	199
NHMA-ENT-199156	Venoe1948	Venø	56.55	8.62	1948	Historical	96	104	109	109	105	105	0	0
NHMA-ENT-199203	Venoe1948	Venø	56.55	8.62	1948	Historical	96	104	111	111	101	105	0	0
NHMA-ENT-199206	Venoe1948	Venø	56.55	8.62	1948	Historical	96	104	109	111	101	105	131	164
NHMA-ENT-199209	Venoe1948	Venø	56.55	8.62	1948	Historical	96	96	111	111	105	105	0	0
NHMA-ENT-199218	Venoe1948	Venø	56.55	8.62	1948	Historical	104	110	111	111	101	105	0	0
NHMA-ENT-199220	Venoe1948	Venø	56.55	8.62	1948	Historical	96	104	111	111	101	101	0	0
NHMA-ENT-199224	Venoe1948	Venø	56.55	8.62	1948	Historical	96	96	111	111	101	101	0	0
NHMA-ENT-199225	Venoe1948	Venø	56.55	8.62	1948	Historical	96	104	111	111	101	105	0	0
NHMA-ENT-199226	Venoe1948	Venø	56.55	8.62	1948	Historical	96	104	111	111	105	105	0	0
NHMA-ENT-199228	Venoe1948	Venø	56.55	8.62	1948	Historical	96	96	111	111	101	105	0	0
NHMA-ENT-199456	Venoe1948	Venø	56.55	8.62	1948	Historical	96	96	109	111	101	105	0	0
NHMA-ENT-199469	Venoe1948	Venø	56.55	8.62	1948	Historical	96	96	109	111	101	105	0	0
NHMA-ENT-199474	Venoe1948	Venø	56.55	8.62	1948	Historical	104	104	111	111	101	105	0	0
NHMA-ENT-199475	Venoe1948	Venø	56.55	8.62	1948	Historical	96	96	0	0	105	105	0	0
NHMA-ENT-199476	Venoe1948	Venø	56.55	8.62	1948	Historical	96	96	109	111	101	105	0	0
NHMA-ENT-199477	Venoe1948	Venø	56.55	8.62	1948	Historical	96	96	111	111	101	105	0	0
VE_K2019_15	VE2019	Vestergård	56.95	8.42	2019	Contemporary	96	96	111	111	101	105	134	134	0	0	200	200	206	206	190	192	153	155	216	216	0	0	197	197
VE_K2019_18	VE2019	Vestergård	56.95	8.42	2019	Contemporary	98	98	111	111	101	101	164	167	0	0	200	200	212	212	186	186	153	153	0	0	0	0	197	197
VE_K2019_19	VE2019	Vestergård	56.95	8.42	2019	Contemporary	96	96	111	111	105	105	164	167	0	0	200	200	0	0	186	196	155	155	0	0	0	0	197	197
VE_K2019_20	VE2019	Vestergård	56.95	8.42	2019	Contemporary	96	96	111	111	105	105	167	167	0	0	200	230	0	0	190	190	153	153	216	216	0	0	197	197
VE_K2019_22	VE2019	Vestergård	56.95	8.42	2019	Contemporary	96	96	111	111	105	105	134	164	0	0	200	200	0	0	186	194	153	155	0	0	0	0	199	199
VE_K2019_23	VE2019	Vestergård	56.95	8.42	2019	Contemporary	0	0	111	111	101	101	134	134	0	0	0	0	206	212	186	194	153	153	216	218	0	0	199	199
VE_K2019-17	VE2019	Vestergård	56.95	8.42	2019	Contemporary	96	96	111	111	101	101	134	134	0	0	200	230	0	0	186	186	153	153	0	0	0	0	197	197
WE_K2019_21	VE2019	Vestergård	56.95	8.42	2019	Contemporary	96	96	111	111	101	101	152	152	0	0	200	230	208	208	204	208	153	153	216	218	0	0	0	0
NHMD-227620	VisoeMose1968	Visø Mose	55.09	9.46	1968	Historical	96	96	109	111	101	101	0	0
NHMD-227676	VisoeMose1968	Visø Mose	55.09	9.46	1968	Historical	96	96	111	111	101	105	134	164
NHMD-227688	VisoeMose1968	Visø Mose	55.09	9.46	1968	Historical	96	96	109	109	101	105	134	164
NHMD-227695	VisoeMose1968	Visø Mose	55.09	9.46	1968	Historical	96	96	111	111	105	105	134	164
NHMD-227834	VisoeMose1968	Visø Mose	55.09	9.46	1968	Historical	104	104	109	109	105	105	134	167
NHMD-227835	VisoeMose1968	Visø Mose	55.09	9.46	1968	Historical	96	110	109	111	105	105	131	140
LS_K2019_11	Vorbasse2019	Vorbasse	55.65	9.09	2019	Contemporary	112	112	109	111	105	105	134	134	0	0	198	226	204	212	166	174	153	153	212	214	0	0	197	199
V_K2019_12	Vorbasse2019	Vorbasse	55.65	9.09	2019	Contemporary	98	98	111	117	105	105	140	140	0	0	196	202	204	204	188	188	153	155	214	214	0	0	199	199
V_K2019_13	Vorbasse2019	Vorbasse	55.65	9.09	2019	Contemporary	96	96	111	117	105	105	140	140	0	0	196	202	0	0	168	188	153	155	216	216	0	0	199	199
V_K2019_14	Vorbasse2019	Vorbasse	55.65	9.09	2019	Contemporary	98	102	109	111	105	105	134	140	0	0	194	196	204	204	174	188	153	153	214	214	0	0	199	199
WGC_2018_1	WGC2018	WGC (Læsø)	57.31	11.07	2018	Contemporary	96	96	109	111	99	103	134	164	0	0	194	200	206	216	186	186	155	155	218	218	0	0	199	199
WGC_2018_10	WGC2018	WGC (Læsø)	57.31	11.07	2018	Contemporary	106	106	109	109	101	105	134	158	0	0	192	192	206	216	186	186	155	155	214	214	0	0	199	199
WGC_2018_2	WGC2018	WGC (Læsø)	57.31	11.07	2018	Contemporary	96	106	109	111	103	103	134	158	0	0	194	200	0	0	186	186	153	155	212	212	0	0	199	199
WGC_2018_3	WGC2018	WGC (Læsø)	57.31	11.07	2018	Combined	106	106	109	109	101	105	164	164	-	-	-	-	-	-	-	-	-	-	-	-	-	-	-	-
WGC_2018_4	WGC2018	WGC (Læsø)	57.31	11.07	2018	Contemporary	96	96	109	109	101	101	134	134	0	0	192	192	206	206	162	162	155	155	214	218	0	0	199	199
WGC_2018_5	WGC2018	WGC (Læsø)	57.31	11.07	2018	Contemporary	96	96	109	109	103	103	164	164	0	0	194	194	206	206	186	186	155	155	0	0	0	0	199	199
WGC_2018_51	WGC2018	WGC (Læsø)	57.31	11.07	2018	Contemporary	96	96	111	111	101	105	134	164	0	0	200	200	216	216	186	186	153	155	214	218	0	0	199	199
WGC_2018_52	WGC2018	WGC (Læsø)	57.31	11.07	2018	Contemporary	96	96	109	111	99	99	164	164	0	0	194	200	206	206	0	0	155	155	218	218	0	0	199	199
WGC_2018_53	WGC2018	WGC (Læsø)	57.31	11.07	2018	Contemporary	106	106	109	109	101	105	134	164	0	0	192	192	216	216	186	186	153	155	214	218	0	0	199	199
WGC_2018_54	WGC2018	WGC (Læsø)	57.31	11.07	2018	Contemporary	96	96	109	109	99	99	134	134	0	0	194	194	206	216	186	186	153	155	214	214	0	0	199	199
WGC_2018_55	WGC2018	WGC (Læsø)	57.31	11.07	2018	Contemporary	106	106	109	109	101	101	134	134	0	0	192	192	206	206	186	186	155	155	0	0	0	0	199	199
WGC_2018_56	WGC2018	WGC (Læsø)	57.31	11.07	2018	Contemporary	96	96	109	111	99	99	134	164	0	0	194	200	206	216	186	188	153	155	214	218	0	0	199	199
WGC_2018_57	WGC2018	WGC (Læsø)	57.31	11.07	2018	Contemporary	98	106	109	111	105	105	134	164	0	0	192	200	204	204	0	0	155	155	0	0	0	0	199	199
WGC_2018_58	WGC2018	WGC (Læsø)	57.31	11.07	2018	Contemporary	106	106	109	111	99	103	134	134	0	0	194	200	206	216	186	188	155	155	0	0	0	0	199	199
WGC_2018_59	WGC2018	WGC (Læsø)	57.31	11.07	2018	Contemporary	96	106	109	111	103	103	134	134	0	0	194	200	204	204	160	160	155	155	216	216	0	0	199	199
WGC_2018_6	WGC2018	WGC (Læsø)	57.31	11.07	2018	Contemporary	96	96	109	111	101	105	134	134	0	0	192	200	206	216	186	186	155	155	214	218	0	0	199	199
WGC_2018_60	WGC2018	WGC (Læsø)	57.31	11.07	2018	Contemporary	106	106	109	109	101	105	158	164	0	0	192	192	204	216	186	186	155	155	212	216	0	0	199	199
WGC_2018_7	WGC2018	WGC (Læsø)	57.31	11.07	2018	Contemporary	96	106	109	109	101	101	152	152	0	0	192	192	208	208	208	208	153	153	214	218	0	0	0	0
WGC_2018_8	WGC2018	WGC (Læsø)	57.31	11.07	2018	Contemporary	96	96	109	111	101	105	134	164	0	0	192	200	206	216	186	186	155	155	214	218	0	0	199	199
WGC_2018_9	WGC2018	WGC (Læsø)	57.31	11.07	2018	Combined	98	98	109	109	101	101	0	0	-	-	-	-	-	-	-	-	-	-	-	-	-	-	-	-
