# Supplementary material
Source: MDPI journal article supplement (https://www.mdpi.com/1424-2818/14/12/1098)

## Contemporary populations

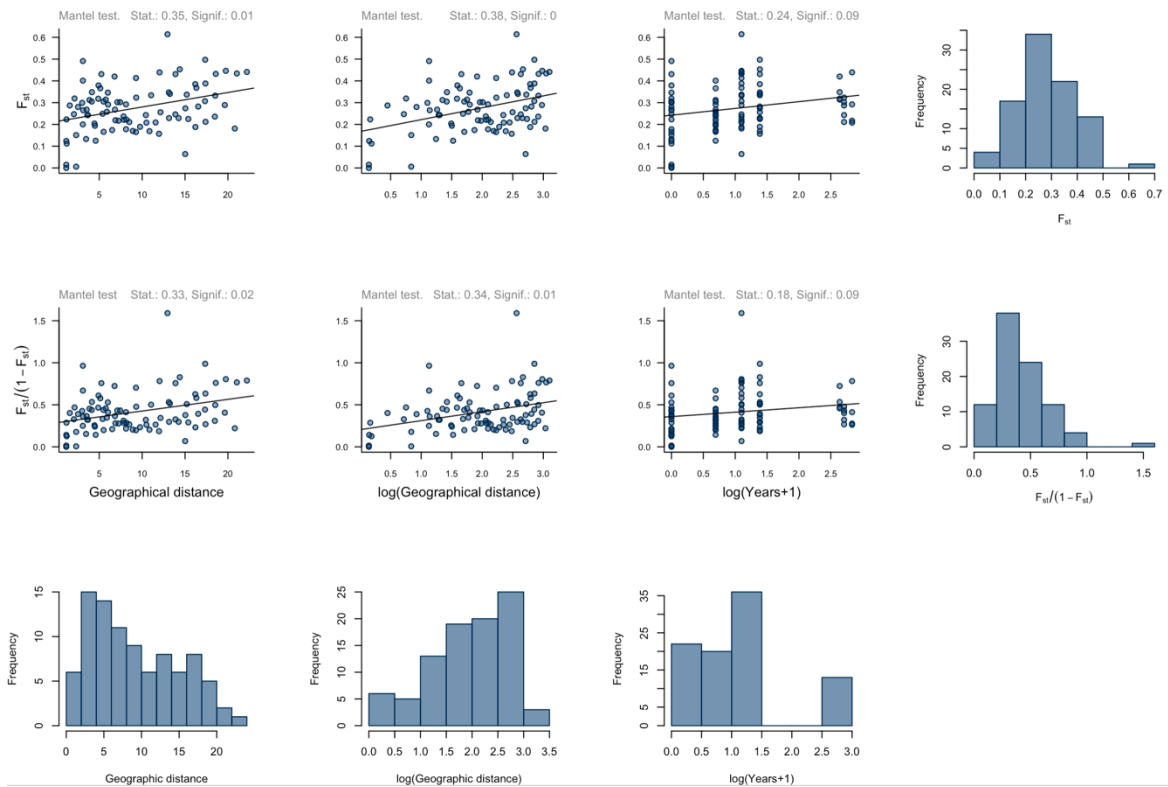

## All populations

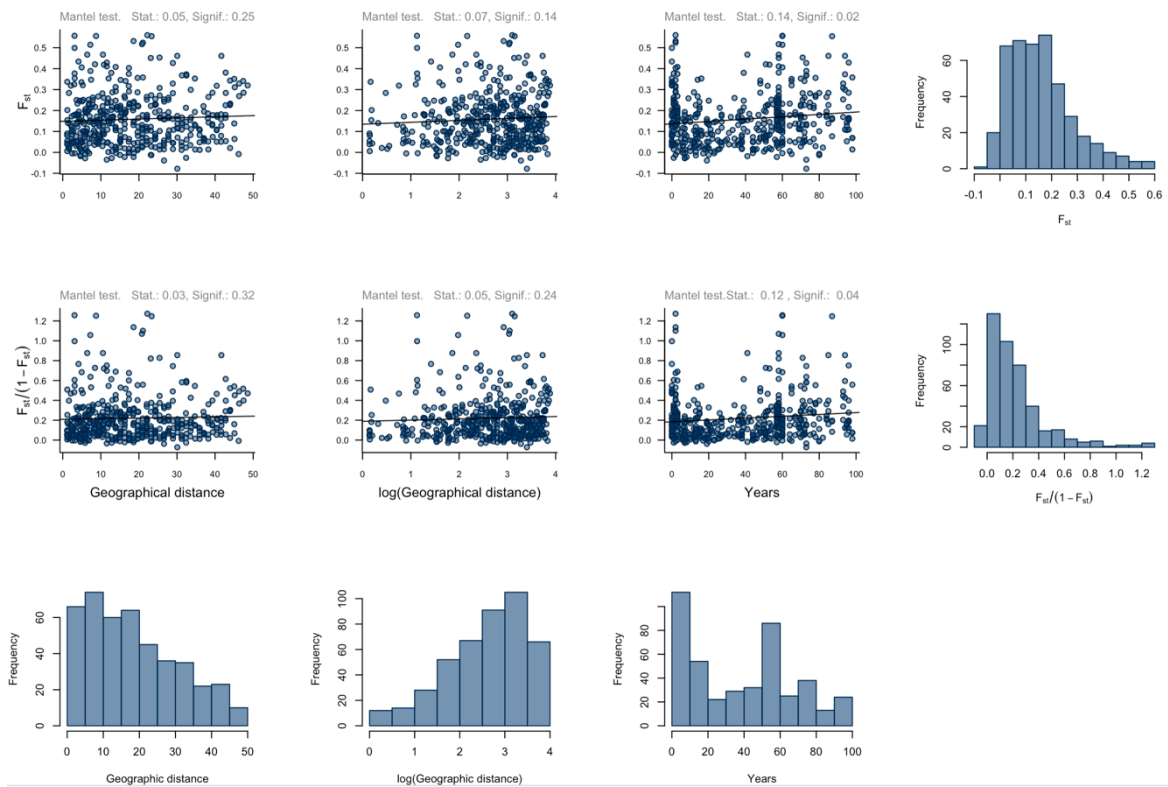

Supplement: s1 [file s1 › Figure S1.pdf]

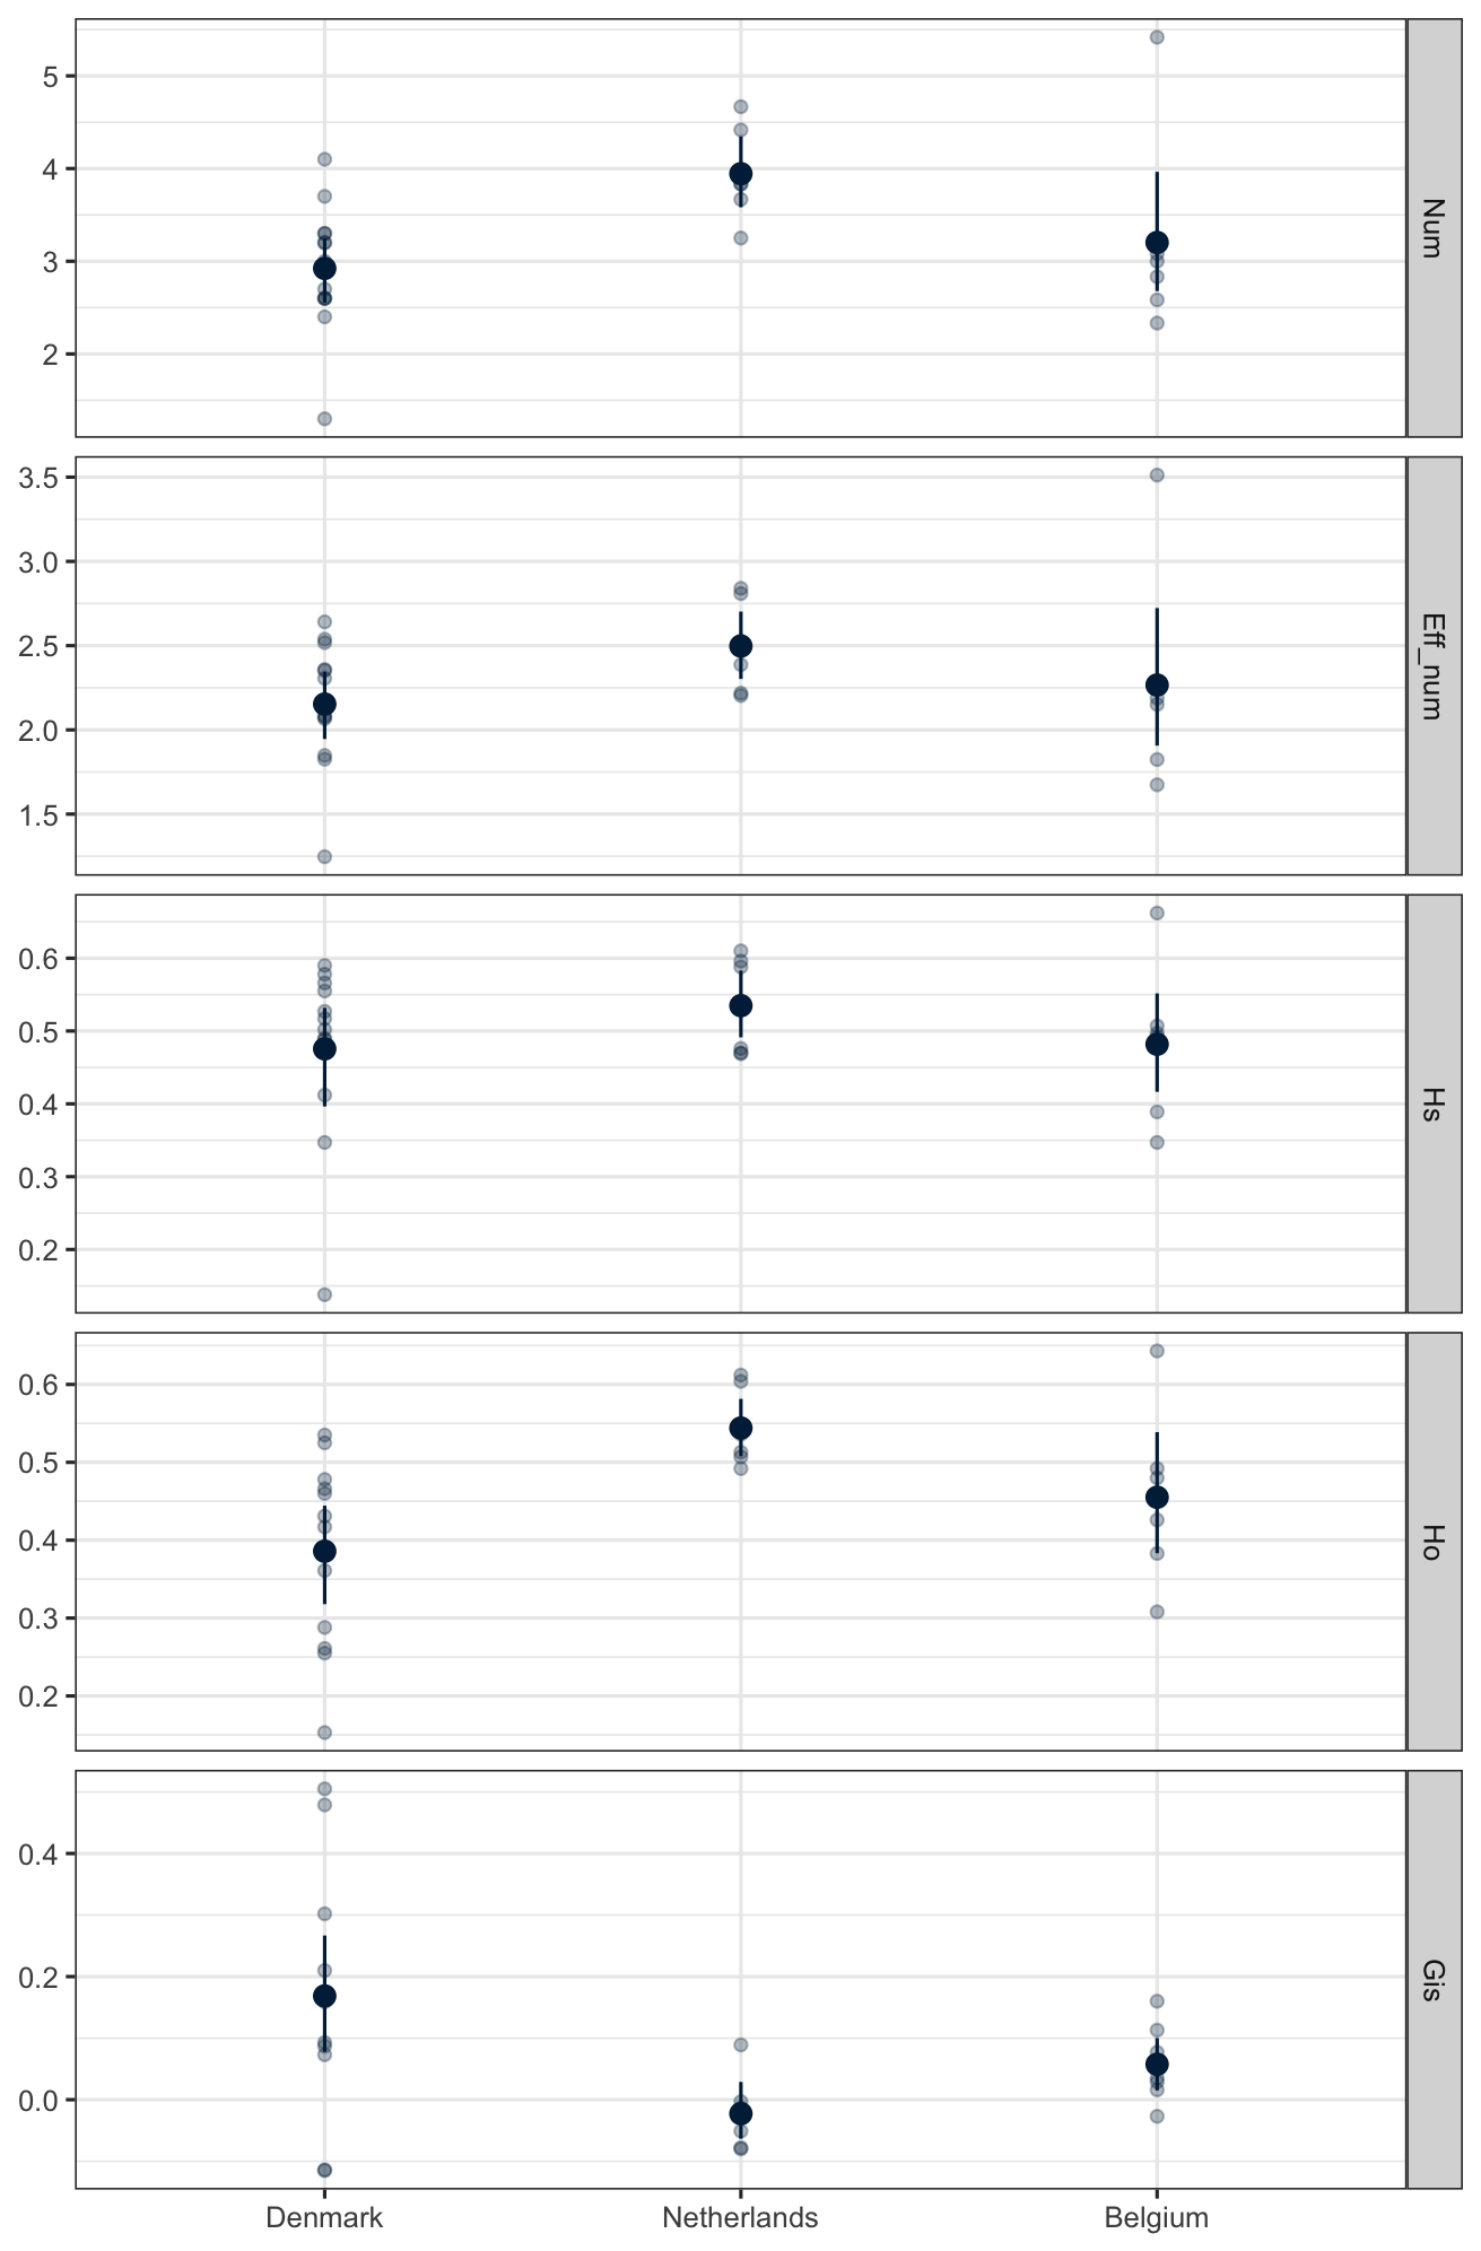

Supplement: s1 [file s1 › Figure S3.pdf]
